1 **Nucleolar-based *Dux* repression is essential for 2-cell stage exit**

2

3 Sheila Q. Xie<sup>1,2</sup>, Bryony J. Leeke<sup>1,2</sup>, Chad Whidling<sup>1,2</sup>, Ryan T. Wagner<sup>3,4</sup>, Ferran Garcia-Llagostera<sup>1,2</sup>,  
4 Paul Chammas<sup>1,2</sup>, Nathan T-F. Cheung<sup>1,2</sup>, Dirk Dormann<sup>1,2</sup>, Michael T. McManus<sup>3</sup> and Michelle  
5 Percharde<sup>1,2\*</sup>

6

7 <sup>1</sup>MRC London Institute of Medical Sciences, Du Cane Road, London, UK

8 <sup>2</sup>Institute of Clinical Sciences, Imperial College London, Du Cane Road, London, UK

9 <sup>3</sup>University of California San Francisco, Parnassus Avenue, San Francisco, USA

10 <sup>4</sup>Present address: Department of Molecular Pharmacology and Experimental Therapeutics, Mayo  
11 Clinic, Rochester, USA

12

13 \*correspondence to [m.percharde@lms.mrc.ac.uk](mailto:m.percharde@lms.mrc.ac.uk)

14

15 **Abstract**

16 Upon fertilisation, the mammalian embryo must switch from dependence on maternal transcripts to  
17 transcribing its own genome, and in mice involves the transient upregulation of MERVL transposons  
18 and MERVL-driven genes at the 2-cell stage. The mechanisms and requirement for MERVL and 2-cell  
19 (2C) gene upregulation are poorly understood. Moreover, this MERVL-driven transcriptional program  
20 must be rapidly shut off to allow 2C exit and developmental progression. Here, we report that robust  
21 ribosomal RNA (rRNA) synthesis and nucleolar maturation are essential for exit from the 2C state. 2C-  
22 like cells and 2C embryos show similar immature nucleoli with altered structure and reduced rRNA  
23 output. We reveal that nucleolar disruption via blocking Pol I activity or preventing nucleolar phase  
24 separation enhances conversion to a 2C-like state in embryonic stem cells (ESCs) by detachment of  
25 the MERVL activator *Dux* from the nucleolar surface. In embryos, nucleolar disruption prevents proper  
26 *Dux* silencing and leads to 2-4 cell arrest. Our findings reveal an intriguing link between rRNA synthesis,  
27 nucleolar maturation and gene repression during early development.

28

29

30 **Introduction**

31

32 Upon fertilisation, one of the earliest requirements for the development of a new organism is the  
33 formation of a totipotent zygote, which possesses the capacity to generate the entire embryo and all  
34 extra-embryonic structures. In mice, only the zygote and 2-cell stage embryo possess  
35 totipotency(Tarkowski 1959; Casser et al. 2017) with subsequent cleavages entailing a decrease in  
36 cellular plasticity as cells become specialised. Cells of the E4.5 epiblast, for example, are pluripotent,  
37 possessing the ability to generate all three germ layers of the embryo yet typically not extra-embryonic  
38 cell types(Rossant et al. 2003; Martinez Arias et al. 2013). Concurrent with the establishment of  
39 totipotency is the essential switch from reliance on maternal transcripts to activation of the embryo's  
40 own genome, termed zygotic or embryonic genome activation (ZGA/EGA). Interestingly, ZGA and  
41 totipotency at the 2-cell stage have been linked to the rapid and transient activation of several families  
42 of transposable elements (TEs), most notably MERVL(Peaston et al. 2004; Svoboda et al. 2004;  
43 Macfarlan et al. 2012).

44

45 TEs have contributed a widespread and significant source of cis-regulatory information to mammalian  
46 genomes, providing transcription factor binding sites, enhancers, and promoter sequences(Kunarso et  
47 al. 2010; Chuong et al. 2013; Sundaram et al. 2014). Many 2-cell-specific and ZGA transcripts use  
48 MERVL LTR sequences as promoters, making the MERVL-dependent transcriptome an important  
49 component of ZGA(Macfarlan et al. 2011; Macfarlan et al. 2012). In humans, specific TEs from the  
50 HERVL family are also expressed upon EGA at the 4-8 cell stage(De Iaco et al. 2017; Hendrickson et  
51 al. 2017). Several studies suggest that correct MERVL regulation is functionally important during  
52 embryogenesis. MERVL depletion impairs developmental progression(Huang et al. 2017), while  
53 overexpression in embryonic stem cells (ESCs) confers expanded fate potential: the ability in chimeras  
54 to generate both embryonic and extra-embryonic lineages, similar to 2-cell blastomeres(Yang et al.  
55 2020). However, the functional relevance of these TEs at ZGA, as well how and why they are swiftly  
56 repressed, is still poorly understood.

57

58 Understanding of the 2-cell stage and ZGA has been enhanced by the identification of a rare, transient  
59 population of cells within ESC cultures that share several epigenetic, metabolic, and transcriptomic  
60 features with 2-cell embryos, termed 2-cell (2C)-like cells(Macfarlan et al. 2012; Boskovic et al. 2014),  
61 marked by expression of a MERVL-GFP (2C-GFP) reporter. This tool recently led to the discovery of a  
62 Dux (DUX4 in human) as a potent MERVL/HERVL and 2C activator. Dux binding directly to 2C/MERVL  
63 promoters is sufficient to convert ESCs to a 2C-like fate, and in zygotes and early 2-cell embryos drives  
64 the expression of many early ZGA and 2C-specific genes(De Iaco et al. 2017; Hendrickson et al. 2017;  
65 Whiddon et al. 2017). Since then, several 2C-activators both upstream and downstream of *Dux* have  
66 been uncovered, including both transcriptional and post-transcriptional regulators(Choi et al. 2017;  
67 Guallar et al. 2018; Eckersley-Maslin et al. 2019; Hu et al. 2020).

68

69 Surprisingly, *Dux* knockout in embryos has overall mild effects, implying the existence of parallel and  
70 redundant mechanisms to activate MERVL and ZGA *in vivo*, which remain to be discovered(Chen and  
71 Zhang 2019; Guo et al. 2019; De Iaco et al. 2020; Bosnakovski et al. 2021). In contrast, the swift  
72 attenuation of *Dux* and MERVL expression for 2-cell stage exit is likely essential both *in vitro* and *in*  
73 *vivo*. *Dux* overexpression arrests embryos at the 2-4 cell stage(Guo et al. 2019), while prolonged *Dux*  
74 overexpression in ESCs causes DNA-damage and apoptosis(Olbrich et al. 2021). Similarly, DUX4 de-  
75 repression in muscle cells causes the human disease, Facioscapulohumeral Muscular Dystrophy  
76 (FSHD), characterised by upregulation of DUX4 target genes, dsRNAs, TEs and apoptosis(Dixit et al.  
77 2007; Geng et al. 2012; Shadle et al. 2017). Despite its importance, the mechanism for such rapid  
78 shutdown of *Dux* and MERVL gene expression at the late 2-cell stage is unclear.

79  
80 Towards this, we recently reported a novel complex that is essential for *Dux* and MERVL/2C repression  
81 during early development, comprising the TE, LINE1 in association with Nucleolin (Ncl) and  
82 Kap1/Trim28 proteins(Percharde et al. 2018). LINE1 RNA in this complex is essential for proper *Dux*  
83 repression and its depletion induces the conversion of ESCs to the 2C-like state and causes 2-cell  
84 arrest in embryos(Percharde et al. 2018). At the same time, the discovery of Ncl as a *Dux* repressor  
85 implied an intriguing potential role for the nucleolus in 2-cell exit, which has not yet been explored.

86  
87 Here, we investigated the impact of nucleolar dynamics and its link to *Dux* repression and 2-cell exit,  
88 using a new 2C-GFP reporter cell system and early mouse embryos. We find that 2C-like cells possess  
89 immature nucleoli with morphology akin to nucleolar precursor bodies (NPBs) that show reduced output  
90 and abrogated *Dux* repression compared to ESCs. Direct disruption of nucleolar structure and function  
91 by RNA Polymerase I inhibition (iPol I) or by perturbation of nucleolar liquid-liquid phase separation is  
92 sufficient to rapidly release *Dux* from perinucleolar regions, activate its expression, and convert ESCs  
93 into a 2C-like state. *In vivo*, short-term iPol I activates *Dux* and impairs developmental progression past  
94 the 2-4 cell stage. Our study reveals a direct link between rRNA transcription, nucleolar-based  
95 repression and cell fate during early mammalian development.

96

## 97 **Results**

98

### 99 **The 2C-GFP/CD4 reporter enables rapid isolation of endogenous 2C-like cells**

100 2-cell(2C)-like cells can be identified from within ESC cultures by expression of a stably-integrated  
101 fluorescent reporter (eg MERVL-GFP, 2C-GFP(Macfarlan et al. 2012; Ishiuchi et al. 2015)). These cells  
102 arise infrequently and transiently at a typical rate of less than 1-2%, making it challenging to perform  
103 large-scale or unbiased analyses in spontaneously-arising cells. Purification by flow cytometry assisted  
104 cell sorting (FACS) is laborious and slow, thus potentially perturbing biological processes(Binek et al.  
105 2019). To perform 2C-like cell characterisation without flow sorting, we devised an improved strategy  
106 to allow FACS-free and rapid isolation of 2C-like cells. We generated ESCs stably harbouring a modified  
107 MERVL-GFP reporter, which induces expression of the extracellular portion of CD4 protein as well as  
108 GFP in the 2C state (2C-GFP/CD4+, Figure 1A). With this technique, naturally-arising 2C-like cells can

109 be rapidly purified from ESC cultures by magnetic bead-based isolation with a typical purity of 55-85%  
110 after only 15 minutes, more than a 100-fold increase over the starting population (Figure 1B-C, Figure  
111 S1A-B). We confirmed that 2C-GFP/CD4+ ("2C-pos") cells express markers of bona fide 2C-like cells,  
112 including high levels of MERVL and 2C-specific transcripts (Figure 1D, S1C). 2C-GFP/CD4+ cells  
113 display induction of MERVL Gag protein, together with loss of Oct4 protein and DAPI-dense  
114 chromocenters (Figure 1E-F), which are all previously-described features of 2C-like cells, and similar  
115 to 2-cell embryos (Macfarlan et al. 2012; Ishiuchi et al. 2015; Percharde et al. 2018). Thus, 2C-  
116 GFP/CD4+ cells faithfully capitulate the 2C-like state.

117

### 118 **2C-like cell nucleoli resemble NPBs and exhibit reduced nucleolar function**

119 We previously discovered that a ribonucleoprotein complex comprising LINE1 RNA, together with  
120 Nucleolin (Ncl) and Kap1, is essential for both ribosomal RNA (rRNA) expression as well as 2-cell  
121 exit(Percharde et al. 2018). Since Ncl and rRNA are both well-known nucleolar components, we  
122 investigated whether the 2C-like state is associated with changes to nucleoli. 2C-positive and negative  
123 cells were isolated following CD4 enrichment and examined by confocal microscopy (Figure 2A).  
124 Interestingly, we found that 2C-like cells possess a distinct nucleolar morphology, with a rounded, ring-  
125 like structure (Figure 2B-C). We next tested whether nucleolar morphological changes in 2C-like cells  
126 might also be accompanied by changes to RNA Polymerase I activity and nucleolar function. Nucleoli  
127 are the site of RNA Polymerase I-driven ribosomal RNA (rRNA) synthesis, processing, and ribosomal  
128 assembly. rRNA makes up over 70% of cellular RNA, which is tightly co-ordinated with *Rpl/Rps* RNA  
129 expression and protein synthesis(Laferte et al. 2006; Percharde et al. 2017). We measured production  
130 of nascent RNA and protein in the 2C-like versus ESC state using Click-iT assays, where a pulse of  
131 nucleotides or amino acid analogues is given to cells that are then fluorescently labelled post fixation  
132 for quantification (Figure 2A). We discovered a significant reduction in translation in 2C-like cells (Figure  
133 2D) as well as reduced nascent RNA synthesis – the majority of which comprises nucleolar rRNA  
134 (Figure 2E, S2A, and inset). To confirm that these changes are not an artefact of CD4-based  
135 enrichment, nascent transcription and translation rates were profiled in unsorted, bulk 2C-GFP reporter  
136 ESCs(Percharde et al. 2018). In agreement, spontaneously-arising 2C-like cells exhibit reductions in  
137 nucleolar function in contrast to neighbouring ESCs (Figure 2F).

138

139 Subsequently, we investigated whether these changes are reflected at the 2-cell stage *in vivo*. Following  
140 fertilisation, 1-2 cell embryos possess immature nucleolar precursor bodies (NPBs) - largely  
141 uncharacterised structures that are initially transcriptionally silent and lacking distinct  
142 compartments(Flechon and Kopecny 1998). In contrast, mature nucleoli contain 3 sub-compartments:  
143 a fibrillar centre surrounded by a dense fibrillar component, which itself is surrounded by a granular  
144 component. In contrast to mature nucleoli, embryo NPBs are morphologically similar to 2C-like nucleoli  
145 (Figure 2B, 2G). Coincident with the increasing initiation of rRNA transcription, mature nucleoli only  
146 gradually form from NPBs at the late 2-cell stage onwards(Kyogoku et al. 2014; Borsos and Torres-  
147 Padilla 2016). We analysed nucleolar function in embryos with nascent transcription/translation assays,  
148 which demonstrated dynamic rates of biosynthesis during the 2-cell stage. Early 2-cell (E2C) embryos

149 exhibit low levels of nascent RNA synthesis but also nucleolar translation, which rapidly increases by  
150 the late 2C (L2C) stage and upon 2-cell exit (Figure 2H). At the same time, Ncl protein only becomes  
151 readily detectable surrounding nucleoli in L2C embryos onwards (Figure 2G), at the time when MERVL  
152 and the 2-cell program is being shut down. We conclude that the 2-cell stage *in vitro* and *in vivo* is  
153 characterised by significantly reduced nucleolar function and morphologically distinct nucleolar  
154 structure.

155

### 156 **Nucleolar disruption induces conversion to the 2C-like state**

157 The observed nucleolar remodelling upon 2-cell stage exit lead us to ask whether alterations to  
158 nucleolar structure and function might be drivers of the 2C-like state. We took advantage of two different  
159 small molecules to inhibit Pol I and rRNA synthesis, CX-5461 - which blocks recruitment of the Pol I  
160 initiation factor SL1 to rDNA(Bywater et al. 2012; Haddach et al. 2012), and BMH-21, which triggers  
161 rapid Pol I degradation(Peltonen et al. 2014). We found that nucleolar disruption by mild or partial  
162 inhibition of rRNA synthesis (Pol I inhibition, iPol I) is detectable by 2h (Figure S3A) and by 4h induces  
163 morphological nucleolar remodelling, generating singular ring-like structures in ESCs resembling 2C-  
164 like nucleoli and embryo NPBs (Figure 3B, Figure 2G). Importantly, the structures observed following  
165 this milder inhibition are distinct from the nucleolar cap-like structures seen upon more extreme  
166 nucleolar stress, where fibrillar proteins such as Fibrillarin (Fbl) or UBF aggregate at the nucleolar  
167 periphery, or from complete dissolution of nucleolar proteins into the nucleoplasm (Figure S3B)(Shav-  
168 Tal et al. 2005; Ide et al. 2020). Moreover, we did not detect gross changes to Ncl or Fbl protein  
169 abundance upon iPol I (Figure S3C). Strikingly, we found that following nucleolar reprogramming, iPol  
170 I causes a significant increase to 20% of 2C-like cells within ESC cultures (Figure 3C). In agreement,  
171 iPol I induces high expression of 2C-specific genes and MERVL transposons (Figure 3D) along with 2C  
172 proteins, Zscan4 and MERVL gag in ESCs (Figure 3E). Thus, nucleolar disruption produces 2C-like  
173 nucleoli and moreover is sufficient to reprogram ESCs into the 2C-like state.

174

### 175 **Nucleolar proteins driving rRNA synthesis and processing are essential for *Dux* and 2C- 176 repression**

177 These results support the hypothesis that the development of functionally mature nucleoli may play a  
178 role in the repression of the 2-cell transcriptional program and for exit from the 2-cell stage. To  
179 investigate this, we asked which nucleolar proteins are most important for repression of the 2C-like  
180 state in ESCs and performed an siRNA miniscreen for nucleolar components in 2C-GFP ESCs. Similar  
181 to the effects of Ncl loss, depletion of Pol I and Fibrillarin (Fbl) also cause a notable increase in 2C-like  
182 cells (Figure 3F, S3D), while knockdown (KD) of other nucleolar proteins has limited effect. Conversely,  
183 KD of Npm3, a negative regulator of ribosome biogenesis(Huang et al. 2005), leads to a small but  
184 consistent reduction in 2C-GFP+ cells (Figure 3F). Confirming these results, siRNAs against Pol I, Fbl  
185 and Ncl all induce high levels of 2C-specific genes and transposons (Figure 3G-H), indicating that these  
186 factors are necessary for repression of the 2C-like state. Interestingly, RNA Pol I, Ncl and Fbl are all  
187 known to be critical for rRNA synthesis and/or processing(Ginisty et al. 1998; Yao et al. 2019; Ide et al.

188 2020). Collectively, these data reveal an intriguing link between rRNA synthesis and 2C-repression to  
189 maintain ESC identity.

190

191 Next, we asked how rRNA synthesis and nucleolar function is mechanistically linked to repression of  
192 the 2C-like state. We focused on *Dux*, which is a potent 2C activator and is upregulated upon nucleolar  
193 protein knockdown (Figure 3H). We performed time-course experiments of acute iPol I treatment  
194 followed by qRT-PCR and RNA-seq (Figure 4A, S4A), and found that *Dux* is significantly induced as  
195 early as 4h following nucleolar disruption (Figure 4A, S4B). By 8h, *Dux* targets are highly upregulated  
196 amongst all significantly altered genes following iPol I (Figure 4B). Moreover, transcriptomic profiling of  
197 2C-specific genes (Macfarlan et al. 2012; Percharde et al. 2018) demonstrated that MERVL and the 2C  
198 program is widely upregulated following nucleolar disruption (Figure 4C, S4B-C). Next, to test whether  
199 2C gene induction is dependent on *Dux*, we performed iPol I experiments with *Dux* siRNAs. We  
200 confirmed that 2C genes are specifically upregulated by 8h iPol I, which is prevented upon *Dux*  
201 depletion (Figure 4D-E). We subsequently investigated whether nucleolar disruption can also prevent  
202 *Dux* silencing in embryos (Figure 4F), which normally occurs rapidly as embryos transit to the late 2-  
203 cell stage (Figure 4G and (De Iaco et al. 2017; Hendrickson et al. 2017)). We found that iPol I treatment  
204 in mid-2C embryos leads to significant rRNA reduction and concomitant *Dux* activation in L2C-4C  
205 embryos (Figure 4G-H). We observed slightly different kinetics with the two inhibitors, with BMH-21  
206 causing more rapid activation of *Dux* in embryos than CX-5461 (Figure 4G-H), similar to in ESCs (Figure  
207 4A). Finally, nucleolar disruption leads to an inability to progress beyond 2-4 cell stage, in contrast to  
208 control embryos (Figure 4I, S4D). Together, these results indicate that nucleolar disruption rapidly leads  
209 to *Dux* de-repression and promotion of the 2-cell state both in ESCs and in embryos.

210

### 211 ***Dux* is repressed in perinucleolar chromatin**

212 Prolonged treatment or high doses of drugs that perturb rRNA synthesis or cause rDNA damage is  
213 known to activate nucleolar stress. In this process, disruption of nucleolar integrity releases ribosomal  
214 proteins into the nucleoplasm to bind MDM2, leading to p53 stabilisation and activation followed by  
215 downstream effects such as cell cycle arrest (Rubbi and Milner 2003; James et al. 2014). To understand  
216 how nucleolar disruption is linked to *Dux* activation, we first tested whether this is dependent on  
217 nucleolar stress. Although iPol I does not induce typical markers of nucleolar stress (Figure S3B), levels  
218 of total and activated, phospho-p53 are increased upon iPol I, similar to the effect of the Topoisomerase  
219 II inhibitor, etoposide, used as a positive control (Figure S5A). Interestingly, etoposide treatment also  
220 increases the proportion of 2C-GFP+ cells in culture (Figure S5B), suggesting that p53 activation can  
221 activate the 2C-like state. Indeed, a recent study reported DNA damage-dependent activation of  
222 *Dux/DUX4* and the 2C-like state via p53 (Grow et al. 2021). However, we did not detect any increase in  
223 phospho-p53 in endogenously arising 2C-like cells (Figure S5C). Furthermore, iPol I treatment is still  
224 able to cause *Dux* activation in the absence of p53 (Figure S5D). Thus, although p53 activation is  
225 sufficient to induce the 2C-like state upon DNA damage (Grow et al. 2021), it is not necessary for *Dux*  
226 de-repression upon nucleolar disruption.

227

228 In ESCs but not 2C-like cells, we reported that *Dux* genes localise to perinucleolar regions with unknown  
229 functional relevance(Percharde et al. 2018). Mature nucleoli are surrounded by a shell of chromatin that  
230 is enriched for repressive histone marks(Nemeth et al. 2010; Lu et al. 2020) and is lowly  
231 transcribed(Quinodoz et al. 2018). We therefore reasoned that disruption of nucleolar function and  
232 morphology might lead to *Dux* upregulation by preventing its repression at the nucleolar periphery. To  
233 observe perinucleolar chromatin in more detail, we performed 3D super-resolution Structured  
234 Illumination Microscopy (3D-SIM) of DAPI staining in ESCs versus 2C-like cells. These experiments  
235 revealed a reduction in perinucleolar chromatin fibres in the 2C state (Figure 5A, orange arrows),  
236 alongside a previously-reported loss of chromocenters(Ishiuchi et al. 2015). Reduced nucleolar DNA  
237 association is moreover replicated upon BMH-21 and CX-5461 treatment (Figure 5B), suggesting that  
238 iPol I perturbs nucleolar-associated chromatin. We next examined whether nucleolar disruption alters  
239 the localisation of the *Dux* gene locus, focusing on acute inhibition to determine direct effects of iPol I.  
240 DNA FISH confirmed that *Dux* is frequently associated with perinucleolar regions in ESCs, and  
241 moreover revealed significant movement away from nucleoli to the nucleoplasm by 4h of either CX-  
242 5461 or BMH-21 (Figure 5C-D). Using 3D nuclear segmentation and analysis of *Dux* distance to nuclear  
243 compartments, we confirmed these findings and found that movement away from the nucleolus starts  
244 from 2h CX-5461 and robustly at 4h. In contrast, there is no change in *Dux* distance from the lamina  
245 (Figure S6A-C). Thus, it is only nucleolar-localised *Dux* alleles that are affected by iPol I. *Dux* movement  
246 is closely linked to reactivation of *Dux* (Figure 4A), with single-cell analysis of *Dux* transcription  
247 demonstrating that maximal nascent expression is reached by 4h iPol I (Figure S6D). Importantly,  
248 nascent *Dux* expression occurs only in the nucleoplasmic or lamina compartments, in strong agreement  
249 with the repressive nature of the nucleolus (Figure S6E).

250  
251 Nucleolar-associated DNA regions (NADs) have been previously identified by isolation and sequencing  
252 of DNA associated with purified nucleoli (NAD-seq(Nemeth et al. 2010; Vertii et al. 2019)), which has  
253 confirmed the generally repressive nature of nucleolar chromatin(Lu et al. 2020). Using NAD  
254 annotations generated from ESCs(Bizhanova et al. 2020), we asked whether the expression of other  
255 nucleolar-associated genes is altered following nucleolar disruption. We looked at Type I NADs, which  
256 overlap constitutively lamina associated domains (cLADs) and are considered to comprise constitutive  
257 heterochromatin, and Type II NADs, which do not overlap LADs in multiple cell types(Peric-Hupkes et  
258 al. 2010). GSEA analysis revealed that Type II NAD genes are particularly sensitive to nucleolar  
259 disruption, and are significantly upregulated from 4h iPol I compared to all genes, in contrast to Type I  
260 NADs (Figure 5E-F). This is not an isolated effect of inhibitor treatment, as knockdown of Ncl or LINE1,  
261 both important for nucleolar function(Percharde et al. 2018; Lu et al. 2020), also lead to NAD and  
262 NAD/LAD gene upregulation (Figure 5E). Together, these results reveal that nucleolar association of  
263 *Dux* is closely tied to its repression, and suggest that iPol I induces global disruption of nucleolar  
264 chromatin organisation and gene expression.

265

266 **Phase-separated nucleolar integrity is required for *Dux* repression at nucleoli**

267 Lastly, we sought to determine the link between disrupted rRNA synthesis and *Dux* loci release and de-  
268 reposition. The membrane-less nucleolus is held together by liquid-liquid phase separation (LLPS),  
269 which is driven by the association of rDNA with nucleolar proteins and moreover dependent on continual  
270 rRNA synthesis (Feric et al. 2016; Yao et al. 2019; Ide et al. 2020). We hypothesized that the disruption  
271 of rRNA synthesis may inhibit nucleolar integrity and LLPS, thus allowing the release of associated  
272 DNA regions such as *Dux*. To test this, we used 1,6-hexanediol (HDL), an aliphatic alcohol used to  
273 disrupt liquid-like condensates (Ribbeck and Gorlich 2002). Short-term treatment with 1% HDL – a dose  
274 notably lower than typically used to disrupt non-nucleolar compartments (Vertii et al. 2019) – is sufficient  
275 to alter nucleolar morphology, resembling 2C-like cells or iPol I treatment (Figure 5G). Disruption of  
276 phase separation remarkably releases *Dux* loci after only 2h HDL (Figure 5H), and moreover leads to  
277 significant *Dux* upregulation by 4h (Figure 5I). Furthermore, we found this to be highly dynamic, with  
278 nucleolar morphology, *Dux* localisation and transcriptional repression all returning to normal after 4h  
279 washout (Figure 5I). These results suggest that *Dux* localisation and repression is maintained in the  
280 nucleolus through LLPS. Taken together, our data show that nucleolar disruption by several means  
281 causes *Dux* reactivation, initiation of 2C/MERVL gene transcription and conversion back to the 2C-like  
282 state. Overall these findings point to a novel requirement for rRNA biogenesis, nucleolar maturation  
283 and nucleolar-based repression for correct cell identity during the earliest stages of embryo  
284 development.

285

286

## 287 **Discussion**

288

289 Major ZGA is an essential process occurring at the 2-cell stage of early mouse embryogenesis, which  
290 entails rapid activation of zygotic RNAs required for subsequent development. This includes a  
291 significant number of transcripts driven by the TE, MERVL, which unlike other ZGA transcripts are  
292 rapidly downregulated upon 2-cell exit. These dynamics swiftly follow the rapid repression of the  
293 MERVL activator, *Dux*. Sustained *Dux* expression in 2-cell embryos is poorly tolerated and moreover  
294 promotes persistence of the 2C program and impedes development (Percharde et al. 2018; Guo et al.  
295 2019). Thus, timely *Dux* repression is essential, yet the mechanisms for this process are poorly  
296 understood.

297

298 Here, we reveal that high rRNA synthesis and nucleolar maturation from inactive NPBs to be an  
299 essential driver of *Dux* repression in embryos and 2C-like cells. The absence of pluripotency proteins  
300 such as Oct4 is a well-known feature of the 2C-like state (Macfarlan et al. 2012). Here we place this  
301 finding within the context of suppression of both rRNA transcription and global translation and reveal  
302 that the 2C-like state is characterised by significantly reduced nucleolar function, akin to NPBs in 2-cell  
303 embryos. NPBs are unique structures that in 1-2 cell embryos lack distinct compartments and exhibit  
304 low rRNA synthesis (Flechon and Kopečný 1998; Borsos and Torres-Padilla 2016). Nucleolar  
305 maturation occurs with the resumption of transcription, and is essential to generate high levels of rRNA  
306 and promote ribosomal assembly to fuel embryonic growth. However, it is becoming clearer that nucleoli



307 also possess other roles in development. NPBs are essential for early centromeric chromatin  
308 organisation, which localises to the surface of NPBs(Zuccotti et al. 2005; Fulka and Langerova 2014)  
309 and nucleolus removal in oocytes causes 2-cell arrest(Ogushi et al. 2008). Intriguingly, reprogramming  
310 to totipotency by somatic cell nuclear transfer (SCNT) generates NPBs after only 3h(Martin et al. 2006),  
311 highlighting a link between totipotency and nucleolar biology. Here, we additionally show that 2C-like  
312 cells have NPB-like nucleoli with reduced chromatin association. We propose that nucleolar maturation  
313 and full nucleolar function is critical for *Dux* recruitment to the nucleolar periphery for its repression,  
314 which is in turn essential for 2-cell exit. Conversely, mild inhibition of Pol I is sufficient to rapidly release  
315 *Dux* from nucleolar chromatin and to activate its expression (Figure 6). In this way, we hypothesise that  
316 ZGA itself provides the mechanism to shut down the 2C program, in a feedback loop whereby high  
317 levels of rRNA synthesis promote nucleolar maturation that can then silence *Dux*.

318

319 Importantly, this mechanism of *Dux* regulation appears separate from nucleolar stress-mediated p53  
320 activation, which is capable of directly inducing *Dux*(Grow et al. 2021). We find that iPol I ESCs or 2C-  
321 like cells do not display typical nucleolar stress markers and iPol I ESCs still activate *Dux* in the absence  
322 of p53. Instead, our data agree with previous nucleolar positioning studies, which demonstrated in yeast  
323 that an ectopic rDNA repeat can silence its chromosomal region(Zuccotti et al. 2005), and that 5S rDNA  
324 sequences are sufficient to induce nucleolar association and silencing of a reporter gene in  
325 ESCs(Fedoriw et al. 2012). Indeed, NAD-seq data(Bizhanova et al. 2020) indicate that *Dux* is located  
326 within a NAD (Figure S7). Interestingly, *D4Z4* repeats containing human *DUX4* have also been  
327 proposed to reside within a NAD(Nemeth et al. 2010) and bound by NCL(Gabellini et al. 2002). Studying  
328 nucleolar regulation of *DUX4* will allow us to understand if failure of a similar mechanism may contribute  
329 to *DUX4* de-repression in the disease, FSHD.

330

331 Our data raise the question of how rRNA transcription is tied to *Dux* nucleolar association and  
332 repression. The nucleolus is self-organised into its three subdomains by phase separation, driven by  
333 the interaction between nucleolar proteins and rDNA(Feric et al. 2016; Yao et al. 2019), and nucleated  
334 by rRNA(Falahati et al. 2016). Indeed, purified Fbl and B23 (Npm1) can separate into distinct layers  
335 and recapitulate the dense fibrillar component and granular component in solution(Feric et al. 2016).  
336 Importantly, the phase separation properties of the nucleolus in cells rely on continual activity of RNA  
337 Pol I, since its inhibition leads to disruption of these compartments(Ide et al. 2020). Our results point to  
338 a model in which *Dux* is held in repressive perinucleolar heterochromatin that is maintained through  
339 LLPS, with perturbation of rRNA transcription or direct inhibition of phase separation sufficient to cause  
340 *Dux* dissociation and de-repression. Similarly, we propose that the NPB structures of early 2C embryos  
341 and 2C-like cells are not competent for *Dux* repression. It will be interesting in future work to understand  
342 in further depth how the nucleolar periphery provides a repressive compartment like the nuclear  
343 lamina(Kind and van Steensel 2010). We previously found that LINE1 RNA and repressors Kap1 and  
344 Ncl bind both *Dux* and rDNA in ESCs(Percharde et al. 2018) with a recent report also identifying  
345 nucleolar Lin28 as a *Dux* repressor within this complex(Sun et al. 2021). Furthermore, it is likely that  
346 other repressor proteins may colocalise at the nucleolar periphery. For example, the histone

347 methyltransferase, G9a has been reported in the nucleolus(Yuan et al. 2007), while a repressive role  
348 for nucleolar RNA Pol II itself has been recently discovered(Abraham et al. 2020).

349

350 In addition to *Dux* regulation, our work points to a wider role for nucleolar chromatin in gene regulation  
351 and its dynamic establishment in early embryos. RNA-seq data upon iPol I suggests that genes within  
352 Type II NADs, regions which are only associated with nucleoli and not constitutive LADs, are most  
353 sensitive to nucleolar disruption. In contrast, Type I NADs that show both nucleolar and constitutive  
354 lamina association are not upregulated upon acute iPol I, in agreement with their classification as  
355 constitutive heterochromatin and their low expression(Vertii et al. 2019; Bizhanova et al. 2020).  
356 Towards this, HDL treatment in MEFs was shown to cause relocation of a Type II, but not Type I,  
357 NAD(Vertii et al. 2019). Future work is needed to understand if these distinct NAD classes show  
358 differences in their association strength with the nucleolus, or if their activation depends on further  
359 mechanisms or factors upon dissociation. For example, neuronal NAD genes detach from the nucleolus  
360 upon neural progenitor cell differentiation yet do not yet become activated, supporting the model that  
361 their release might poise them for later expression(Bersaglieri et al. 2020).

362

363 More broadly, it will be important in future work to understand how nucleolar chromatin organisation  
364 proceeds in early embryos, as well as to uncover which genes rely on nucleolar association for their  
365 repression. Together with new findings of nucleolar function/dysfunction in multiple processes such as  
366 protein quality control(Azkanaz et al. 2019; Frottin et al. 2019), cancer(Lindstrom et al. 2018) and  
367 aging(Buchwalter and Hetzer 2017; Tiku and Antebi 2018), our data reveal a novel axis of nucleolar  
368 biology in early development and reflect the multi-faceted function of the nucleolus.

## 369 **Materials and Methods**

370

### 371 **Mice and embryos**

372 All animal experiments were performed according to a UK Home Office Project Licence in a Home  
373 Office-designated facility, using 4-6-week old female and 2-6-month-old male CD1 mice (Charles  
374 River). Animals were maintained on a 12h light/dark cycle and provided with *ad libitum* food and water  
375 in individually ventilated cages. Female mice were superovulated by intra-peritoneal injection of 5 I.U  
376 of pregnant mare serum gonadotropin (PMSG, Folligon, MSD Animal Health), followed by 5 I.U of  
377 human chorionic gonadotropin (hCG, Chorulon, MSD Animal Health) 46-48h later, then placed  
378 immediately with males. Zygotes were collected from oviducts ~22-24h post-hCG in M-2 medium  
379 (Sigma, M7167), isolated from cumulus cells with 200 $\mu$ g/mL Hyaluronidase (Sigma, H3506), washed  
380 through successive drops of M-2, and then cultured in pre-equilibrated KSOMaa (Sigma, MR-106-D) in  
381 microdrops overlaid with mineral oil (Sigma, M5310) or in 4-well dishes. Zygotes were cultured in a  
382 humidified incubator at 37 $^{\circ}$ C, 5% CO<sub>2</sub>, until early 2-cell (31-33h post-hCG), late 2-cell (48-49h post-  
383 hCG), morula (3d post-hCG), or blastocyst (4d post-hCG).

384

### 385 **ESC culture**

386 Mouse E14Tg2A (E14) ESCs (male) were used for all experiments(Hooper et al. 1987) and to derive  
387 2C-GFP reporter cells. 2C-GFP reporter ESCs are described previously(Percharde et al. 2018) and  
388 were used when prior purification of larger numbers of 2C-like cells was not needed or for validation.  
389 All ESCs were cultured at 37 $^{\circ}$ C, 5% CO<sub>2</sub>, on 0.1% gelatin-coated plates in ES-FBS culture medium  
390 (high glucose DMEM GlutaMAX with sodium pyruvate (Thermo Fisher Scientific), 15% FBS (Gibco),  
391 0.1mM non- essential amino acids (Gibco), 0.1mM 2-Mercaptoethanol (Millipore) and 1,000U/ml LIF  
392 supplement (ESGRO, Millipore). ESCs were routinely tested for mycoplasma and found to be negative.  
393 Inhibitors (Table S2) were added to ESCs at the indicated concentrations unless otherwise explicitly  
394 mentioned in the figure legend.

395

### 396 **2C-GFP/CD4 cell line**

397 The 2C-GFP reporter construct(Ishiuchi et al. 2015) was modified to insert a T2A cleavage element  
398 followed by the extracellular portion of mouse CD4 (a.a.1-427) immediately downstream of GFP, so  
399 that activation of MERVL in the 2C-like state labels cells doubly positive for GFP and CD4. ESCs are  
400 negative for CD4 expression, enabling rapid purification of endogenous 2C-like cells via selection for  
401 CD4+ surface expression. E14 ESCs were nucleofected with 4 $\mu$ g linearized 2C-GFP plasmid and plated  
402 at low density in 10cm<sup>2</sup> plates then selected with 250  $\mu$ g/mL G418 (Mirus) for 8 days. Individual colonies  
403 were picked and expanded, with a single colony that showed high specific expression of GFP expanded  
404 and used for subsequent validations and experiments. For 2C-GFP/CD4 isolation, cells were  
405 trypsinised, washed, and resuspended in FACS buffer (PBS, 3% FBS, 1mM EDTA) then either isolated  
406 by MACS, using CD4 (L3T4) microbeads (Miltenyi Biotec), or with the EasySep mouse CD4 Positive  
407 selection kit II (StemCell), according to the manufacturer's protocols in each case. Apart from Figure  
408 S1, all purification experiments were performed with the EasySep kit. Flow-through cells were collected

409 as the 2C-negative population. For flow cytometry analysis, ESCs were pelleted and resuspended in  
410 FACS buffer containing 1:8000 Sytox Blue (Thermo Fisher Scientific) to enable exclusion of dead cells.

411

#### 412 **siRNA-mediated knockdown**

413 The nucleolar miniscreen was performed with a Cherry Pick custom library plate of OnTargetPlus  
414 siRNAs (Horizon Discovery), consisting of 20 wells of different gene-targeting siRNA pools and 3  
415 siControl wells. 2C-GFP ESCs (non-CD4) at a density of 10,000 cells per 96-well were transfected in  
416 suspension with 3pmol siRNA and 0.17uL Lipofectamine 2000 per well of a 96-well plate and incubated  
417 overnight. The media was changed the following day then cells cultured for a further 2 days before  
418 analysis. For flow cytometry, ESCs were trypsinised, transferred to a 96-well, round-bottom plate,  
419 pelleted, washed and then resuspended in PBS plus 1:8000 Sytox Blue (Thermo Fisher Scientific), then  
420 the %GFP in live cells analysed by flow cytometry on a BD Fortessa cytometer. The nucleolar  
421 miniscreen was performed in triplicate wells and the entire experiment repeated on a different day with  
422 highly similar results. Z-scores were calculated as the %2C-GFP value for each factor minus the  
423 average 2C-GFP level for the entire plate, divided by the plate standard deviation. Other siRNA  
424 transfections or validation experiments were performed as above, scaling up cell numbers,  
425 Lipofectamine and siRNA amounts accordingly for ESCs cultured in 12- or 24-well plates, with cells  
426 harvested at the indicated time points.

427

#### 428 **Nascent transcription/translation assays**

429 Nascent transcription (EU) and translation (HPG) assays were carried out as described  
430 previously(Percharde et al. 2018) using Click-iT Assay Kits (Thermo Fisher Scientific) and according to  
431 the manufacturer's protocol. For HPG assays, ESCs were cultured in medium made with DMEM lacking  
432 methionine (Gibco, #21013024) for 1h prior to HPG addition. ESCs were cultured with 1 mM EU or 50  
433 uM HPG for 45 min before fixation, permeabilization and Click-iT reaction. Where indicated,  
434 immunofluorescence labelling was carried out prior to Click-iT as described above with the exception  
435 that primary antibodies were added for 1-2h at RT.

436

#### 437 **Western blotting**

438 Whole cell extracts were prepared from ESCs by scraping in ice-cold RIPA buffer containing protease-  
439 inhibitors (Halt), incubating for 30 min at 4°C, then pelleting at 16000g, 20 min to remove insoluble  
440 material. Proteins were quantified by the BCA assay (Pierce) and equal amounts loaded onto 4-12%  
441 Bolt Bis-Tris plus SDS-PAGE gels (Thermo Fisher) to separate proteins, then transferred onto PVDF  
442 membranes. Blocking was performed in 5% milk/PBS-T for 1h then membranes incubated overnight  
443 with primary antibodies at 4oC in milk/PBS-T. Next day, membranes were incubated with the  
444 appropriate HRP-conjugated secondary antibodies (Cell Signaling) for 1h, then proteins detected by  
445 ECL reagent on an Amersham Imager 680.

446

#### 447 **RNA Extraction and Expression Analysis**

448 RNA was isolated directly from ESCs by scraping in RLT lysis buffer (Qiagen) containing 1:100 beta-  
449 mercaptoethanol (Sigma), or RLT was added to equal numbers of ESCs for CNN approaches. RNA  
450 was purified and DNase I treated according to the manufacturer's instructions using RNeasy mini kits  
451 (Qiagen). For embryo inhibitor experiments, 2-cell embryos were flushed at 46h post-hCG and cultured  
452 in KSOMaa medium containing either 1 $\mu$ M CX-5461, BMH-21, or 0.1% DMSO in a 4-well dish. Culture  
453 in inhibitors began after 1h for a period of 8 or 24 hours. Equal numbers of embryos per experimental  
454 condition were lysed in 75  $\mu$ L buffer RLT prepared as above, and the RNA isolated according to RNeasy  
455 micro kits (Qiagen). In ESCs and embryos, cDNA synthesis was performed with up to 1 $\mu$ g DNase-  
456 treated RNA using a High Capacity RNA-to-cDNA kit (Thermo Fisher Scientific), and qRT-PCR  
457 performed with SYBR green (KAPA) on a QuantStudio 5 qPCR machine (Thermo Fisher Scientific).  
458 qRT-PCR data were normalised to two housekeeping genes (Rpl7/H2A), unless a cell-number-  
459 normalisation (CNN) approach was used as detailed in the legend. Primer sequences are described in  
460 Table S2.

461

### 462 **RNA-sequencing and Analysis**

463 For RNA-seq, RNA was extracted utilizing the RNeasy mini kit as for qRT-PCR, then 3 biological  
464 replicates per condition of DNase-treated total RNA spiked with ERCCs (Thermo Fisher) was used for  
465 RNA-seq library preparation and sequencing at the MRC LMS genomics core facility. RNA quality was  
466 assessed using the Agilent 2100 RNA 6000 Nano assay and libraries were prepared using the NEBNext  
467 Ultra II Directional RNA Library Prep Kit with NEBNext Poly(A) mRNA Magnetic Isolation Module,  
468 following manufacturer's instructions. Library quality was evaluated using the Agilent 2100 High-  
469 Sensitivity DNA assay, and their concentrations measured using the Qubit™ dsDNA HS Assay Kit.  
470 Libraries were pooled in equimolar quantities and sequenced on an Illumina NextSeq 2000 to generate  
471 a minimum of 40 million Single Read 50bp reads (with unique 8bp dual indexes) per sample. Reads  
472 were trimmed and aligned to reference genome mm10 plus ERCCs using Tophat2. Default settings  
473 were used apart from the specification 'g -1' to map each multimapping read to one random TE or gene  
474 in the genome. Reads were counted using the Subread package, FeatureCounts to each gene or TE  
475 family. Data were filtered to exclude rows with counts per million (cpm) >0 in fewer than 3 samples. To  
476 account for any global decreases in RNA amounts due to iPol I, we used our previously described cell-  
477 number-normalised (CNN) approach to normalise reads to the abundance of ERCC spike-  
478 ins(Percharde et al. 2017) using Limma Voom. All other RNA-seq analyses and statistics were  
479 performed in R/Bioconductor. Normalised RNA-seq expression data are available in Table S1. RNA-  
480 seq data have been uploaded to GEO, accession GSE185424.

481

482 For analysis of NAD gene expression, NAD regions defined in ESCs were taken from Bizhanova et al.,  
483 2020(Bizhanova et al. 2020). Type I NADs (overlapping constitutive LADs) and Type II NADs  
484 (overlapping constitutive interLADs) were defined as described in Vertii et al., 2019(Vertii et al. 2019)  
485 using LAD data from Peric-Hupkes et al., 2010(Peric-Hupkes et al. 2010), after LAD coordinates were  
486 shifted to mm10 using LiftOver tool (UCSC Genome Browser). For an example of NAD/LAD  
487 classification at the *Dux* locus see Figure S7. Ranked lists of log<sub>2</sub> fold-change were prepared from RNA-

488 seq of Pol I inhibitor treated ESCs (this study) and Ncl and LINE1 knockdown ESCs(Percharde et al.  
489 2018). Ranked lists and Type I and Type II NAD files were submitted to the GSEA pre-ranked tool  
490 (genepattern.org) with the following parameters: permutations = 10000, collapse dataset =  
491 No\_Collapse, and max gene set size = 4000. Normalised enrichment score (NES) and false discovery  
492 rate q-value (FDR) for each RNA-seq dataset were plotted using R/ggplot2.

493

#### 494 **ESC Immunofluorescence**

495 ESCs were allowed to adhere to Matrigel-coated 8-well chambers or 10 mm glass coverslips for 1-2h,  
496 fixed in 4% PFA for 10min, then stored in PBS until staining. Blocking and permeabilization was carried  
497 out in one step in immunofluorescence (IF) buffer (PBS, 10% donkey serum, 2.5% BSA), plus 0.4%  
498 Triton X-100 for 30min. Primary antibody incubations were carried out overnight at 4°C using the  
499 indicated antibodies and dilutions in IF buffer in Table S2. Next day, samples were washed with PBS  
500 and incubated in secondary antibodies (1:500 Alexa-488nm, 594nm, or 647nm- conjugated antibodies)  
501 for 1h at RT, followed by a wash for 30 min in PBS plus DAPI, two more washes in PBS, then samples  
502 mounted in Vectashield mounting medium containing DAPI. Confocal images were taken on a Leica  
503 SP5 fluorescent microscope under an oil immersion 63X objective.

504

#### 505 **Embryo in vitro culture EU/HPG and IF experiments**

506 Embryos were fixed in 4% PFA in PBS containing 0.1% Triton X-100 for 30 min, followed by three  
507 washes in PBS containing 0.1% PVA (PBS-PVA). Samples were permeabilised in PBS containing 0.5%  
508 Triton X-100 for 30 minutes, followed by blocking in 5% BSA in PBS for 1.5 hours. A 1:100 dilution of  
509 primary antibody (rabbit anti-nucleolin, Abcam, ab22558) was prepared in blocking solution, and  
510 embryos were incubated in 10 µl drops in a humidified Terasaki plate (Greiner Bio-One) at 4°C  
511 overnight. Embryos were washed three times in PBS containing 0.1% Tween-20 and 0.1% PVA (PBST-  
512 PVA) for five minutes. A 1:500 dilution of secondary antibody (donkey anti-rabbit Alexa Fluor 488,  
513 ThermoFisher, A21206) was prepared in blocking solution, and embryos were incubated in 10 µL drops  
514 in a humidified Terasaki plate for 1h in the dark. EU and HPG assays were performed as for ESCs,  
515 except that embryos were incubated for 1h in pre-equilibrated KSOM (without amino acids; Millipore),  
516 prior to incubation in KSOM containing 500 µm HPG or 1 mM EU for 2h. Embryos were fixed in 4%  
517 PFA in PBS containing 0.1% Triton X-100 for 15 minutes, and permeabilised in 0.5% Triton X-100 in  
518 PBS for 20 minutes, prior to Click-iT reactions. Prior to mounting, all samples were washed three times  
519 in PBST-PVA for five minutes, followed by a 30 min incubation in 1:1000 DAPI in PBS, and a further  
520 three washes in PBS-PVA. Embryos were mounted in Vectashield (Vector Laboratories) under a  
521 20x20mm #1.5 coverslip (Agar Scientific) supported at the corners by Dow Corning high-vacuum  
522 silicone grease (Sigma-Aldrich) and sealed with nail polish. Confocal images were captured using a  
523 Leica SP5 or SP8 fluorescence microscope using an oil immersion 40X objective and acquired in 1 µm  
524 Z-stacks. All steps were carried out in 500 µl volumes at room temperature unless otherwise noted.

525

#### 526 **Single Molecule RNA FISH combined with immunofluorescence staining (Immuno-smRNA- 527 FISH)**

528 *Dux* smRNA-FISH was based on branched DNA technology  
529 ([https://www.thermofisher.com/uk/en/home/life-science/cell-analysis/cellular-imaging/in-situ-](https://www.thermofisher.com/uk/en/home/life-science/cell-analysis/cellular-imaging/in-situ-hybridization-ish/rna-fish.html)  
530 [hybridization-ish/rna-fish.html](https://www.thermofisher.com/uk/en/home/life-science/cell-analysis/cellular-imaging/in-situ-hybridization-ish/rna-fish.html)) to detect the dynamics of *Dux* expression upon the inhibition of  
531 ribosomal RNA synthesis. A target set of 20 short Alexa647 labelled oligo mouse *Dux* ViewRNA ISH  
532 probe (VB6-3223670-VC, type-6; ThermoFisher Scientific) was designed and used to hybridize to *Dux*  
533 RNA sequence. Cells were first adhered on Matrigel-coated 10 mm glass coverslips and fixed with 4%  
534 paraformaldehyde in DEPC-treated PBS, containing 2.5% Acetic acid for 10 mins. Immunolabeling with  
535 performed with mouse anti-B23 primary antibody (1:300; 2h) then detected with Alexa 488 donkey anti-  
536 mouse antibody (Invitrogen; 1:500; 1h), then further fixed with 4% paraformaldehyde in DEPC-PBS, 10  
537 min to preserve immunocomplexes before FISH. smRNA FISH was carried out in accordance with the  
538 manufacturer's protocol for the ViewRNA™ ISH Cell Assay (QVC001; ThermoFisher Scientific). Briefly,  
539 previously immunolabelled cells were washed in PBS (3x), permeabilised (1:2 digestion solution in  
540 DEPC-PBS; 5 min), protease treated (1:8000 in DEPC-PBS, 10 min), and subsequently hybridized with  
541 Alexa 647 ViewRNA ISH *Dux* probe (P4, 1:100 in QF diluent; 3h, 40°C). Following probe hybridisation,  
542 cells were washed and then subjected to sequential hybridisation with pre-amplifier DNA, amplifier DNA  
543 and fluorophore labeled in provided diluent (1:25, 1h, 40°C each step). After detection, cells were  
544 washed and nuclei were stained with 1µg/ml DAPI in PBS before imaging. Control experiments were  
545 performed with either hybridisation with mouse B-actin probe as a positive control that revealed  
546 abundant b-actin RNA foci throughout nucleus and cytoplasm, or RNase A treatment (250 µg/ml in PBS,  
547 2h, 37°C) prior to hybridisation, which abrogated *Dux* signals.

548

#### 549 **DNA FISH with immunofluorescence (Immuno-DNA-FISH)**

550 Immunofluorescence detection of nucleolus and nuclear lamina combined with DNA was performed  
551 essentially as described previously (Beagrie et al. 2017). Briefly, ESCs were fixed with 4% plus 0.1%  
552 Triton in PBS, 10 min, washed in PBS (3x), equilibrated in 20% glycerol in PBS (3x, 10min),  
553 subsequently then frozen in liquid nitrogen and stored at -80°C. After thawing, cells were washed in  
554 PBS 3x, permeabilized for 10 min with 0.1% triton in PBS and blocked with 2% BSA-PBS, 30 min,  
555 before immunolabeling. Cells were incubated with the indicated mouse anti-B23 as above; and rabbit  
556 anti-laminB1 (1:2000; ab16048; Abcam) antibodies in 2% BSA in PBS for 2h, then detected with  
557 AlexaFluor488 or 647-conjugated antibodies. After immunolabelling, cells were fixed with 4% PFA in  
558 PBS for 30 min prior to FISH to preserve immunocomplexes during FISH. *Dux* oligo probes used to  
559 detect *Dux* foci were used and labelled with Cy3 fluorophores (PA23001; Amersham) as described  
560 previously (Percharde et al. 2018). For hybridisation, 1 µg mouse Cot1 DNA (18440; Invitrogen), 10 µg  
561 salmon sperm DNA (15632011; Invitrogen) and 3 µl Cy3- labelled *Dux* oligos, respectively, were  
562 precipitated and resuspended in 6 µl of hybridisation buffer (H7782, Sigma-Aldrich) ready for DNA  
563 FISH. Immunolabelled cells were rinsed 3x in PBS, incubated for 15 min in 20 mM glycine in PBS, rinsed  
564 3x in PBS, permeabilised for 10 min with 0.2% Triton, and then washed again. Cells were incubated for  
565 1-2h at 37°C with 250 µg/ml RNase A (Sigma) in 2x SSC, treated for 10 min with 0.1 M HCl, dehydrated  
566 in ethanol (50% to 100% series, 3 min each), dried briefly, denatured for 10 min at 80°C in 70%  
567 deionized formamide in 2xSSC, and then re-dehydrated as above. After a brief period of drying,

568 coverslips were overlaid onto probe mixture on Hybrislips (H18200; Molecular Probe by Life  
569 Technology) and sealed with Fixogum rubber cement (11FIXO0125; MP Biomedicals) for in situ  
570 hybridisation. Hybridization was carried out at 37°C in a moist chamber for at least 40 h. Post-  
571 hybridization washes were as follows: 40% formamide in 2xSSC (3x 10min); 2xSSC (3x, 10min); and  
572 (3x, PBS). Nuclei were counterstained with 1µg/ml DAPI in PBS for 30 min and mounted in (Vectashield  
573 H-1000; Vector Laboratories) immediately prior to imaging.

574

### 575 **Super-Resolution Structured Illumination Microscopy (SIM)**

576 Purified 2C-GFP/CD4-negative and positive cells or wild-type ESCs incubated for 8h with or without  
577 iPol I were adhered on Matrigel-coated µ-Slide 8 Well Glass Bottom (80827; Ibidi) and fixed with 4%  
578 paraformaldehyde in PBS for 10 min then stored in PBS at 4°C before immunolabeling. Cells were  
579 rinsed 3x in PBS, incubated for 15 min in 20 mM glycine in PBS, rinsed, permeabilized with 0.1% Triton  
580 X-100 for 10 min in PBS, blocked for 1h with 4% BSA in PBS then incubated with mouse anti-B23 to  
581 detect nucleoli in 4% BSA in PBS overnight at 4°C. Next day, samples were washed 3x for 60 min with  
582 2% BSA in PBS, then incubated 2h with Alexa secondary antibodies (1:250) washed again as above.  
583 Finally, samples were washed and counterstained with 1µg/ml DAPI (30 min), rinsed successively in  
584 PBS before coverslips were mounted in VectaShield. The long incubation times used allow for antibody  
585 accessibility throughout the cells, providing the highest sensitivity for SIM imaging. Multi-colour SIM  
586 imaging was performed using a Zeiss Elyra S.1 (Carl Zeiss Microimaging) and a Plan-Apochromat  
587 63x/1.4 oil lens. Raw SIM images were acquired with an sCMOS camera (pco.Edge 4.2) using five  
588 phase shifts and three grid rotations, with a z step size of 0.1 µm. Different fluorescent labels were  
589 acquired sequentially using 642, 561, 488 and 405nm laser lines. SIM images were reconstructed with  
590 ZEN 2012 SP4 (Black) software (Carl Zeiss Microimaging, version 13.0.2.518 ), using default parameter  
591 settings. Channel alignment was performed using calibrations obtained from a multi-coloured bead  
592 slide, acquired with equivalent acquisition settings.

593

### 594 **ESC Confocal microscopy and Quantitative Image Analysis**

595 Multi-colour image single snapshots (IF and EU/HPG assays) or Z-stacks (250nm stepsize, RNA/DNA  
596 FISH) were acquired with a laser-scanning confocal microscope with a pinhole diameter of 1 Airy unit  
597 (Leica TCS SP5 or SP8; Objective lens: 63x/1.40NA Oil CS2 HC PL APO; laser lines:  
598 405/488/552/638nm). Different channels were imaged sequentially to avoid bleed through and cross-  
599 excitation and then exported as TIFF files for further images analysis. RNA and DNA FISH image Z-  
600 stacks were also acquired on an Olympus spinning disk confocal system based on an IX83 inverted  
601 microscope stand (Yokogawa CSU-W1 scanhead with 50µm diameter pinhole disk; Objective lens:  
602 60x/1.40NA Plan-Apo; Hamamatsu ORCA Flash 4.0 V2 camera, stepsize 200nm). Raw .lif images were  
603 processed into TIFF files and merged, each channel manually thresholding or filtering with the same  
604 setting in Fiji software for data analysis.

605

606 Dux FISH 3D spatial analysis was undertaken using custom written scripts in Fiji for nuclei and nucleoli  
607 segmentation, and Imaris (version 9.6.0, Bitplane AG) for Dux FISH probe identification and distance



608 measurements. Briefly, identification of LaminB1 labelled Nuclei and B23 labelled Nucleoli was  
609 performed in Fiji in combination with the MorphoLibJ plugin to perform 3D segmentation. Labelled  
610 image masks generated were combined with the original image stack and imported into Imaris for use  
611 with the 'Cells' Package, to facilitate interactive review of 3D segmentation results and Dux FISH probe  
612 identification. Identified *Dux* FISH loci were related to each individual nucleus and contained nucleoli,  
613 and distance to the nearest nucleoli and nuclei border measured.

614

615 The analysis of nucleolar morphology and fluorescence intensities was carried out with a custom written  
616 CellProfiler pipeline (<https://cellprofiler.org/>; software version 4.1.3). To describe and quantify the  
617 number of "ring-shaped" nucleoli - showing a distinct fluorescent B23 signal at the rim of the nucleoli  
618 with a much dimmer interior signal – the fluorescence intensity distribution over four concentric layers  
619 in each nucleolus was measured. The mean fluorescence intensity of the outer layer was divided by  
620 the mean intensity of the innermost layer and any nucleolus with a ratio greater than 1.4 was counted  
621 in the "ring-shaped" category. Nucleolar circularity ("Form Factor") was calculated within CellProfiler  
622 according to  $4\pi \times [\text{Area}]/[\text{Perimeter}]^2$ , excluding very small nucleoli which are liable to give unreliable  
623 measurements (FormFactor values >1).

624

#### 625 **Statistical analysis**

626 All statistical analyses were carried out in Prism 7 or above (Graphpad) or R (RNA-seq data). Details  
627 of individual tests are outlined within each figure legend, including number and type of replication  
628 performed (n) and the reported error either as standard deviation (s.d) or standard error of the mean  
629 (s.e.m). All statistics are \*  $p < 0.05$ , \*\*  $p < 0.01$ , \*\*\*  $p < 0.001$ , \*\*\*\*  $p < 0.0001$  with the relevant test  
630 performed described in figure legends and corrections for multiple testing applied where necessary.  
631 Welch's correction was applied to t-tests when the variance was unequal between conditions.

632

#### 633 **Data Availability**

634 RNA-seq data have been uploaded to GEO, accession GSE185424.

635

#### 636 **Code Availability**

637 RNA-seq data were analysed with standard packages and programs, as detailed in the Methods. Code  
638 for data processing and analysis are available at <https://github.com/mpercharde/RNAseq> and/or are  
639 available upon request.

640

#### 641 **Acknowledgements**

642 We thank Alexis Barr, Aydan Bulut-Karslioglu, Harry Leitch and members of the Percharde lab for  
643 critical reading and comments on the manuscript. We thank the MRC LMS genomics, imaging and flow  
644 cytometry cores for technical services. Thank you to Tristan Rodriguez for *p53*-null ESCs. Work in the  
645 Percharde lab is supported by a UKRI Future Leaders Fellowship (MC\_EX\_MR/S015930/1) and  
646 funding from the Medical Research Council (MRC, MC\_UP\_1605/4) to M.P. Work in the McManus Lab  
647 is supported by NIH 5R01GM123556.

648

649 **Author Contributions**

650 M.P. conceived the project. S.Q.X., B.J.L, P.C, F.G-L, N.T-F.C and M.P. designed and performed  
651 experiments. C.W. and D.D. performed microscopy image analysis with S.Q.X.. R.T.W. generated 2C-  
652 GFP/CD4 ESCs, supervised by M.T.M.. B.J.L and M.P. performed computational analysis. S.Q.X and  
653 M.P. wrote the manuscript with input from all authors.

654

655 **Competing Interests Statement**

656 The authors declare no competing interests

657

658 **References**

659

- 660 Abraham KJ, Khosraviani N, Chan JNY, Gorthi A, Samman A, Zhao DY, Wang M, Bokros M, Vidya E,  
661 Ostrowski LA et al. 2020. Nucleolar RNA polymerase II drives ribosome biogenesis. *Nature* **585**:  
662 298-302.
- 663 Azkanaz M, Rodriguez Lopez A, de Boer B, Huiting W, Angrand PO, Vellenga E, Kampinga HH, Bergink  
664 S, Martens JH, Schuringa JJ et al. 2019. Protein quality control in the nucleolus safeguards  
665 recovery of epigenetic regulators after heat shock. *Elife* **8**.
- 666 Beagrie RA, Scialdone A, Schueler M, Kraemer DC, Chotalia M, Xie SQ, Barbieri M, de Santiago I,  
667 Lavitas LM, Branco MR et al. 2017. Complex multi-enhancer contacts captured by genome  
668 architecture mapping. *Nature* **543**: 519-524.
- 669 Bersaglieri C, Kresoja-Rakic J, Gupta S, Bär D, Kuzyakiv R, Santoro R. 2020. Genome-wide maps of  
670 nucleolus interactions reveal distinct layers of repressive chromatin domains. *bioRxiv*:  
671 2020.2011.2017.386797.
- 672 Binek A, Rojo D, Godzien J, Ruperez FJ, Nunez V, Jorge I, Ricote M, Vazquez J, Barbas C. 2019. Flow  
673 Cytometry Has a Significant Impact on the Cellular Metabolome. *J Proteome Res* **18**: 169-181.
- 674 Bizhanova A, Yan A, Yu J, Zhu LJ, Kaufman PD. 2020. Distinct features of nucleolus-associated  
675 domains in mouse embryonic stem cells. *Chromosoma* **129**: 121-139.
- 676 Borsos M, Torres-Padilla ME. 2016. Building up the nucleus: nuclear organization in the establishment  
677 of totipotency and pluripotency during mammalian development. *Genes & development* **30**: 611-  
678 621.
- 679 Boskovic A, Eid A, Pontabry J, Ishiuchi T, Spiegelhalter C, Raghu Ram EV, Meshorer E, Torres-Padilla  
680 ME. 2014. Higher chromatin mobility supports totipotency and precedes pluripotency in vivo.  
681 *Genes & development* **28**: 1042-1047.
- 682 Bosnakovski D, Gearhart MD, Ho Choi S, Kyba M. 2021. Dux facilitates post-implantation development,  
683 but is not essential for zygotic genome activation. *Biol Reprod* **104**: 83-93.
- 684 Buchwalter A, Hetzer MW. 2017. Nucleolar expansion and elevated protein translation in premature  
685 aging. *Nat Commun* **8**: 328.
- 686 Bywater MJ, Poortinga G, Sanij E, Hein N, Peck A, Cullinane C, Wall M, Cluse L, Drygin D, Anderes K  
687 et al. 2012. Inhibition of RNA polymerase I as a therapeutic strategy to promote cancer-specific  
688 activation of p53. *Cancer Cell* **22**: 51-65.
- 689 Casser E, Israel S, Witten A, Schulte K, Schlatt S, Nordhoff V, Boiani M. 2017. Totipotency segregates  
690 between the sister blastomeres of two-cell stage mouse embryos. *Sci Rep* **7**: 8299.
- 691 Chen Z, Zhang Y. 2019. Loss of DUX causes minor defects in zygotic genome activation and is  
692 compatible with mouse development. *Nature genetics* **51**: 947-951.
- 693 Choi YJ, Lin CP, Risso D, Chen S, Kim TA, Tan MH, Li JB, Wu Y, Chen C, Xuan Z et al. 2017. Deficiency  
694 of microRNA miR-34a expands cell fate potential in pluripotent stem cells. *Science* **355**.
- 695 Chuong EB, Rumi MA, Soares MJ, Baker JC. 2013. Endogenous retroviruses function as species-  
696 specific enhancer elements in the placenta. *Nature genetics* **45**: 325-329.
- 697 De Iaco A, Planet E, Coluccio A, Verp S, Duc J, Trono D. 2017. DUX-family transcription factors regulate  
698 zygotic genome activation in placental mammals. *Nature genetics* **49**: 941-945.
- 699 De Iaco A, Verp S, Offner S, Grun D, Trono D. 2020. DUX is a non-essential synchronizer of zygotic  
700 genome activation. *Development* **147**.
- 701 Dixit M, Anseau E, Tassin A, Winokur S, Shi R, Qian H, Sauvage S, Matteotti C, van Acker AM, Leo  
702 O et al. 2007. DUX4, a candidate gene of facioscapulohumeral muscular dystrophy, encodes a  
703 transcriptional activator of PITX1. *Proc Natl Acad Sci U S A* **104**: 18157-18162.
- 704 Eckersley-Maslin M, Alda-Catalinas C, Blotenburg M, Kreibich E, Krueger C, Reik W. 2019. Dppa2 and  
705 Dppa4 directly regulate the Dux-driven zygotic transcriptional program. *Genes & development*  
706 **33**: 194-208.
- 707 Falahati H, Pelham-Webb B, Blythe S, Wieschaus E. 2016. Nucleation by rRNA Dictates the Precision  
708 of Nucleolus Assembly. *Curr Biol* **26**: 277-285.
- 709 Fedoriw AM, Starmer J, Yee D, Magnuson T. 2012. Nucleolar association and transcriptional inhibition  
710 through 5S rDNA in mammals. *PLoS Genet* **8**: e1002468.
- 711 Feric M, Vaidya N, Harmon TS, Mitrea DM, Zhu L, Richardson TM, Kriwacki RW, Pappu RV,  
712 Brangwynne CP. 2016. Coexisting Liquid Phases Underlie Nucleolar Subcompartments. *Cell*  
713 **165**: 1686-1697.
- 714 Flechon JE, Kopečný V. 1998. The nature of the 'nucleolus precursor body' in early preimplantation  
715 embryos: a review of fine-structure cytochemical, immunocytochemical and autoradiographic  
716 data related to nucleolar function. *Zygote* **6**: 183-191.

- 717 Frottin F, Schueder F, Tiwary S, Gupta R, Korner R, Schlichthaerle T, Cox J, Jungmann R, Hartl FU,  
718 Hipp MS. 2019. The nucleolus functions as a phase-separated protein quality control  
719 compartment. *Science* **365**: 342-347.
- 720 Fulka H, Langerova A. 2014. The maternal nucleolus plays a key role in centromere satellite  
721 maintenance during the oocyte to embryo transition. *Development* **141**: 1694-1704.
- 722 Gabellini D, Green MR, Tupler R. 2002. Inappropriate gene activation in FSHD: a repressor complex  
723 binds a chromosomal repeat deleted in dystrophic muscle. *Cell* **110**: 339-348.
- 724 Geng LN, Yao Z, Snider L, Fong AP, Cech JN, Young JM, van der Maarel SM, Ruzzo WL, Gentleman  
725 RC, Tawil R et al. 2012. DUX4 activates germline genes, retroelements, and immune mediators:  
726 implications for facioscapulohumeral dystrophy. *Dev Cell* **22**: 38-51.
- 727 Ginisty H, Amalric F, Bouvet P. 1998. Nucleolin functions in the first step of ribosomal RNA processing.  
728 *EMBO J* **17**: 1476-1486.
- 729 Grow EJ, Weaver BD, Smith CM, Guo J, Stein P, Shadle SC, Hendrickson PG, Johnson NE, Butterfield  
730 RJ, Menafra R et al. 2021. p53 convergently activates Dux/DUX4 in embryonic stem cells and in  
731 facioscapulohumeral muscular dystrophy cell models. *Nature genetics* **53**: 1207-1220.
- 732 Guallar D, Bi X, Pardavila JA, Huang X, Saenz C, Shi X, Zhou H, Faiola F, Ding J, Haruehanroengra P  
733 et al. 2018. RNA-dependent chromatin targeting of TET2 for endogenous retrovirus control in  
734 pluripotent stem cells. *Nature genetics* **50**: 443-451.
- 735 Guo M, Zhang Y, Zhou J, Bi Y, Xu J, Xu C, Kou X, Zhao Y, Li Y, Tu Z et al. 2019. Precise temporal  
736 regulation of Dux is important for embryo development. *Cell Res* **29**: 956-959.
- 737 Haddach M, Schwaebe MK, Michaux J, Nagasawa J, O'Brien SE, Whitten JP, Pierre F, Kerdoncuff P,  
738 Darjania L, Stansfield R et al. 2012. Discovery of CX-5461, the First Direct and Selective Inhibitor  
739 of RNA Polymerase I, for Cancer Therapeutics. *ACS Med Chem Lett* **3**: 602-606.
- 740 Hendrickson PG, Dorais JA, Grow EJ, Whiddon JL, Lim JW, Wike CL, Weaver BD, Pflueger C, Emery  
741 BR, Wilcox AL et al. 2017. Conserved roles of mouse DUX and human DUX4 in activating  
742 cleavage-stage genes and MERVL/HERVL retrotransposons. *Nature genetics* **49**: 925-934.
- 743 Hooper M, Hardy K, Handyside A, Hunter S, Monk M. 1987. HPRT-deficient (Lesch-Nyhan) mouse  
744 embryos derived from germline colonization by cultured cells. *Nature* **326**: 292-295.
- 745 Hu Z, Tan DEK, Chia G, Tan H, Leong HF, Chen BJ, Lau MS, Tan KYS, Bi X, Yang D et al. 2020.  
746 Maternal factor NELFA drives a 2C-like state in mouse embryonic stem cells. *Nat Cell Biol* **22**:  
747 175-186.
- 748 Huang N, Negi S, Szebeni A, Olson MO. 2005. Protein NPM3 interacts with the multifunctional nucleolar  
749 protein B23/nucleophosmin and inhibits ribosome biogenesis. *J Biol Chem* **280**: 5496-5502.
- 750 Huang Y, Kim JK, Do DV, Lee C, Penfold CA, Zyllicz JJ, Marioni JC, Hackett JA, Surani MA. 2017.  
751 STELLA modulates transcriptional and endogenous retrovirus programs during maternal-to-  
752 zygotic transition. *Elife* **6**.
- 753 Ide S, Imai R, Ochi H, Maeshima K. 2020. Transcriptional suppression of ribosomal DNA with phase  
754 separation. *Sci Adv* **6**.
- 755 Ishiuchi T, Enriquez-Gasca R, Mizutani E, Boskovic A, Ziegler-Birling C, Rodriguez-Terrones D,  
756 Wakayama T, Vaquerizas JM, Torres-Padilla ME. 2015. Early embryonic-like cells are induced  
757 by downregulating replication-dependent chromatin assembly. *Nat Struct Mol Biol* **22**: 662-671.
- 758 James A, Wang Y, Raje H, Rosby R, DiMario P. 2014. Nucleolar stress with and without p53. *Nucleus*  
759 **5**: 402-426.
- 760 Kind J, van Steensel B. 2010. Genome-nuclear lamina interactions and gene regulation. *Curr Opin Cell*  
761 *Biol* **22**: 320-325.
- 762 Kunarso G, Chia NY, Jeyakani J, Hwang C, Lu X, Chan YS, Ng HH, Bourque G. 2010. Transposable  
763 elements have rewired the core regulatory network of human embryonic stem cells. *Nature*  
764 *genetics* **42**: 631-634.
- 765 Kyogoku H, Kitajima TS, Miyano T. 2014. Nucleolus precursor body (NPB): a distinct structure in  
766 mammalian oocytes and zygotes. *Nucleus* **5**: 493-498.
- 767 Laferte A, Favry E, Sentenac A, Riva M, Carles C, Chedin S. 2006. The transcriptional activity of RNA  
768 polymerase I is a key determinant for the level of all ribosome components. *Genes &*  
769 *development* **20**: 2030-2040.
- 770 Lindstrom MS, Jurada D, Bursac S, Orsolich I, Bartek J, Volarevic S. 2018. Nucleolus as an emerging  
771 hub in maintenance of genome stability and cancer pathogenesis. *Oncogene* **37**: 2351-2366.
- 772 Lu JY, Shao W, Chang L, Yin Y, Li T, Zhang H, Hong Y, Percharde M, Guo L, Wu Z et al. 2020. Genomic  
773 Repeats Categorize Genes with Distinct Functions for Orchestrated Regulation. *Cell Rep* **30**:  
774 3296-3311 e3295.

- 775 Macfarlan TS, Gifford WD, Agarwal S, Driscoll S, Lettieri K, Wang J, Andrews SE, Franco L, Rosenfeld  
776 MG, Ren B et al. 2011. Endogenous retroviruses and neighboring genes are coordinately  
777 repressed by LSD1/KDM1A. *Genes & development* **25**: 594-607.
- 778 Macfarlan TS, Gifford WD, Driscoll S, Lettieri K, Rowe HM, Bonanomi D, Firth A, Singer O, Trono D,  
779 Pfaff SL. 2012. Embryonic stem cell potency fluctuates with endogenous retrovirus activity.  
780 *Nature* **487**: 57-63.
- 781 Martin C, Brochard V, Migne C, Zink D, Debey P, Beaujean N. 2006. Architectural reorganization of the  
782 nuclei upon transfer into oocytes accompanies genome reprogramming. *Mol Reprod Dev* **73**:  
783 1102-1111.
- 784 Martinez Arias A, Nichols J, Schroter C. 2013. A molecular basis for developmental plasticity in early  
785 mammalian embryos. *Development* **140**: 3499-3510.
- 786 Nemeth A, Conesa A, Santoyo-Lopez J, Medina I, Montaner D, Peterfia B, Solovei I, Cremer T, Dopazo  
787 J, Langst G. 2010. Initial genomics of the human nucleolus. *PLoS Genet* **6**: e1000889.
- 788 Ogushi S, Palmieri C, Fulka H, Saitou M, Miyano T, Fulka J, Jr. 2008. The maternal nucleolus is  
789 essential for early embryonic development in mammals. *Science* **319**: 613-616.
- 790 Olbrich T, Vega-Sendino M, Tillo D, Wu W, Zolnerowich N, Pavani R, Tran AD, Domingo CN, Franco  
791 M, Markiewicz-Potoczny M et al. 2021. CTCF is a barrier for 2C-like reprogramming. *Nat*  
792 *Commun* **12**: 4856.
- 793 Peaston AE, Evsikov AV, Graber JH, de Vries WN, Holbrook AE, Solter D, Knowles BB. 2004.  
794 Retrotransposons regulate host genes in mouse oocytes and preimplantation embryos. *Dev Cell*  
795 **7**: 597-606.
- 796 Peltonen K, Colis L, Liu H, Trivedi R, Moubarek MS, Moore HM, Bai B, Rudek MA, Bieberich CJ, Laiho  
797 M. 2014. A targeting modality for destruction of RNA polymerase I that possesses anticancer  
798 activity. *Cancer Cell* **25**: 77-90.
- 799 Percharde M, Lin CJ, Yin Y, Guan J, Peixoto GA, Bulut-Karslioglu A, Biechele S, Huang B, Shen X,  
800 Ramalho-Santos M. 2018. A LINE1-Nucleolin Partnership Regulates Early Development and  
801 ESC Identity. *Cell* **174**: 391-405 e319.
- 802 Percharde M, Wong P, Ramalho-Santos M. 2017. Global Hypertranscription in the Mouse Embryonic  
803 Germline. *Cell Rep* **19**: 1987-1996.
- 804 Peric-Hupkes D, Meuleman W, Pagie L, Bruggeman SW, Solovei I, Brugman W, Graf S, Flicek P,  
805 Kerkhoven RM, van Lohuizen M et al. 2010. Molecular maps of the reorganization of genome-  
806 nuclear lamina interactions during differentiation. *Mol Cell* **38**: 603-613.
- 807 Quinodoz SA, Ollikainen N, Tabak B, Palla A, Schmidt JM, Detmar E, Lai MM, Shishkin AA, Bhat P,  
808 Takei Y et al. 2018. Higher-Order Inter-chromosomal Hubs Shape 3D Genome Organization in  
809 the Nucleus. *Cell* **174**: 744-757 e724.
- 810 Ribbeck K, Gorlich D. 2002. The permeability barrier of nuclear pore complexes appears to operate via  
811 hydrophobic exclusion. *EMBO J* **21**: 2664-2671.
- 812 Rossant J, Chazaud C, Yamanaka Y. 2003. Lineage allocation and asymmetries in the early mouse  
813 embryo. *Philos Trans R Soc Lond B Biol Sci* **358**: 1341-1348; discussion 1349.
- 814 Rubbi CP, Milner J. 2003. Disruption of the nucleolus mediates stabilization of p53 in response to DNA  
815 damage and other stresses. *EMBO J* **22**: 6068-6077.
- 816 Shadle SC, Zhong JW, Campbell AE, Conerly ML, Jagannathan S, Wong CJ, Morello TD, van der  
817 Maarel SM, Tapscott SJ. 2017. DUX4-induced dsRNA and MYC mRNA stabilization activate  
818 apoptotic pathways in human cell models of facioscapulohumeral dystrophy. *PLoS Genet* **13**:  
819 e1006658.
- 820 Shav-Tal Y, Blechman J, Darzacq X, Montagna C, Dye BT, Patton JG, Singer RH, Zipori D. 2005.  
821 Dynamic sorting of nuclear components into distinct nucleolar caps during transcriptional  
822 inhibition. *Mol Biol Cell* **16**: 2395-2413.
- 823 Sun Z, Yu H, Zhao J, Tan T, Pan H, Zhu Y, Chen L, Zhang C, Zhang L, Lei A et al. 2021. LIN28  
824 coordinately promotes nucleolar/ribosomal functions and represses the 2C-like transcriptional  
825 program in pluripotent stem cells. *Protein Cell*.
- 826 Sundaram V, Cheng Y, Ma Z, Li D, Xing X, Edge P, Snyder MP, Wang T. 2014. Widespread contribution  
827 of transposable elements to the innovation of gene regulatory networks. *Genome research* **24**:  
828 1963-1976.
- 829 Svoboda P, Stein P, Anger M, Bernstein E, Hannon GJ, Schultz RM. 2004. RNAi and expression of  
830 retrotransposons MuERV-L and IAP in preimplantation mouse embryos. *Dev Biol* **269**: 276-285.
- 831 Tarkowski AK. 1959. Experiments on the development of isolated blastomers of mouse eggs. *Nature*  
832 **184**: 1286-1287.
- 833 Tiku V, Antebi A. 2018. Nucleolar Function in Lifespan Regulation. *Trends Cell Biol* **28**: 662-672.

- 834 Vertii A, Ou J, Yu J, Yan A, Pages H, Liu H, Zhu LJ, Kaufman PD. 2019. Two contrasting classes of  
835 nucleolus-associated domains in mouse fibroblast heterochromatin. *Genome research* **29**: 1235-  
836 1249.
- 837 Whiddon JL, Langford AT, Wong CJ, Zhong JW, Tapscott SJ. 2017. Conservation and innovation in  
838 the DUX4-family gene network. *Nature genetics* **49**: 935-940.
- 839 Yang F, Huang X, Zang R, Chen J, Fidalgo M, Sanchez-Priego C, Yang J, Caichen A, Ma F, Macfarlan  
840 T et al. 2020. DUX-miR-344-ZMYM2-Mediated Activation of MERVL LTRs Induces a Totipotent  
841 2C-like State. *Cell Stem Cell* **26**: 234-250 e237.
- 842 Yao RW, Xu G, Wang Y, Shan L, Luan PF, Wang Y, Wu M, Yang LZ, Xing YH, Yang L et al. 2019.  
843 Nascent Pre-rRNA Sorting via Phase Separation Drives the Assembly of Dense Fibrillar  
844 Components in the Human Nucleolus. *Mol Cell* **76**: 767-783 e711.
- 845 Yuan X, Feng W, Imhof A, Grummt I, Zhou Y. 2007. Activation of RNA polymerase I transcription by  
846 cockayne syndrome group B protein and histone methyltransferase G9a. *Mol Cell* **27**: 585-595.
- 847 Zuccotti M, Garagna S, Merico V, Monti M, Alberto Redi C. 2005. Chromatin organisation and nuclear  
848 architecture in growing mouse oocytes. *Mol Cell Endocrinol* **234**: 11-17.
- 849

850 **Figure Legends**

851

852 **Figure 1. A new reporter cell line for purification of 2C-like cells.**

853 (A) Reporter design: a previous MERVL-GFP reporter(Ishiuchi et al. 2015) is modified to contain the  
854 extracellular portion of the CD4 antigen downstream of GFP and a T2A cleavage element, allowing  
855 rapid 2C-like cell purification by anti-CD4 beads.

856 (B) Representative flow cytometry plot depicting proportion of typical 2C-GFP+ (2C-pos) cells before  
857 (left) and after (right) CD4-based 2C enrichment.

858 (C) Percent recovery of 2C-GFP positive (pos) cells after CD4-based purification, comparing CD4+  
859 cells (eluate) and CD4- cells (flow-through). Data are mean +/- s.e.m of 3 experiments.

860 (D) qRT-PCR validation of high levels of 2C-specific genes and TEs in the CD4+ eluate compared to  
861 CD4- fraction and the starting population. Data are mean +/- s.e.m of 3 experiments.

862 (E) Representative confocal images and (F) quantification of levels of Oct4 and MERVL gag proteins  
863 and DAPI in 2C-pos versus 2C-neg cells following CD4-based purification. Scale bar, 20  $\mu$ m

864 All P values represent two-tailed, unpaired Student's t-test, with Welch correction for uneven variance  
865 where relevant.

866

867 **Figure 2. 2C-like cells and embryos have altered nucleolar morphology and function.**

868 (A) Experimental set-up for 2C-like cell profiling: following CD4-based enrichment, 2C-neg/pos  
869 populations are plated into Matrigel-coated chambers for a minimum of 1h before the indicated  
870 downstream applications.

871 (B) Immunofluorescence images and quantification (RingShape+, CellProfiler) appearance in 2C-  
872 pos/neg cells, revealing that 2C-like cell nucleoli, stained by the nucleolar marker B23 (Npm1), have  
873 rounded, ring-like morphology, n, number of nucleoli scored. Scale bar, 20  $\mu$ m.

874 (C) Nucleolar circularity is significantly increased in 2C-like cells. Very small nucleoli (area <100 pixels)  
875 were filtered out as can typically generate unreliable measurements (see methods).

876 (D-E) Immunofluorescence images and quantification of (D) nascent translation and (E) nascent  
877 transcription rates in 2C-pos versus 2C-neg cells via HPG or EU Click-iT incorporation  
878 experiments, respectively. Scale bar, 25  $\mu$ m.

879 (F) Confirmation of reduced transcription and translation in 2C-like (2C-GFP+) cells within unsorted  
880 populations, using an independent 2C-GFP cell line(Percharde et al. 2018). Scale bar, 10  $\mu$ m.

881 (G) Nucleolar (Nucleolin, Ncl) staining in in vitro cultured embryos, showing the emergence of Ncl+  
882 nucleoli at the late 2-cell stage (L2C). PN5, zygote PN5 stage, E2C, early 2-cell stage; PB, polar  
883 body. Scale bar, 20  $\mu$ m

884 (H) Analysis of nascent transcription/translation in embryos by EU/HPG assays. Scale bar, 20  $\mu$ m.

885 Insets show EU/HPG staining alone (grayscale) in a representative blastomere from each image.

886 P values represent (B) Chi-squared test and (C, D-E) two-tailed Student's t-test, with Welch's correction  
887 for uneven variance where relevant.

888

889 **Figure 3. Nucleolar disruption induces the 2C-like state.**

- 890 (A) Representative immunofluorescence images following staining for nucleolar markers (Fibrillarin,  
891 Fbl) and B23 4h after RNA Pol I inhibition (iPol I), with either CX-5461 or BMH-21. Scale bar, 20  
892  $\mu\text{m}$ .
- 893 (B) Quantification of the percentage of ring-like (RingShape+) nucleoli 4h after iPol I. P values, Chi-  
894 squared test; n, number of nucleoli.
- 895 (C) Percentage of 2C-GFP+ cells following overnight (16-24h) treatment with 0.25  $\mu\text{M}$  iPol I, data are  
896 mean  $\pm$  s.e.m, n=3 biological replicates representative of 3+ experiments.
- 897 (D) qRT-PCR analysis of 2C-specific genes and TEs following iPol I as in (C), with P values in (C-D)  
898 representing 2-tailed t-test with two-stage multiple comparisons correction.
- 899 (E) Western blots showing upregulation of 2C-specific proteins, Zscan4 and MERV1 gag, after 16-24h  
900 iPol I in ESCs. Replicates from two experiments are shown.
- 901 (F) Flow cytometry analysis of % 2C-GFP+ cells following siRNA knockdown of the indicated factors.  
902 Red samples indicate a Z-score of  $>1$ , with KD of Ncl shown as a positive control (teal). Data are  
903 mean  $\pm$  s.e.m of 3 biological replicates, representative of two repeats of the screen.
- 904 (G) Validation by qRT-PCR of siRNA-mediated knockdown of the indicated factors and  
905 (H) upregulation of 2C-specific genes, showing mean  $\pm$  s.e.m of n=2-3 biological replicates,  
906 representative of 2 experiments. P values, 2-way ANOVA followed by Dunnett's multiple  
907 comparisons test.

908

909 **Figure 4. Nucleolar disruption causes *Dux* reactivation in ESCs and embryos.**

- 910 (A) Cell-number normalised (CNN) qRT-PCR time course analysis of *Dux* upregulation following iPol I.  
911 Data are analysed as CNN to exclude potential global effects of iPol I on transcription; however the  
912 same results are seen with *Rpl7/H2A* normalisation. Data are mean  $\pm$  s.e.m, n=3 biological  
913 replicates. P values, two-way ANOVA and Šídák multiple comparisons test.
- 914 (B) Boxplot of log<sub>2</sub>-fold change values for n=99 *Dux* target genes(Percharde et al. 2018) versus  
915 significantly altered non-targets (FDR  $<0.05$ , n=8057: CX-5461, n=13830: BMH-21) following 8h  
916 iPol I. P values, two-sided Wilcoxon rank-sum test.
- 917 (C) Heatmap of 2C-specific genes(Macfarlan et al. 2012) showing gradual upregulation following iPol  
918 I. Samples are grouped by unsupervised hierarchical clustering.
- 919 (D-E) Expression of (D) *Dux* and (E) 2C-specific genes or a negative control (IAPEz) in iPol I rescue  
920 experiments with control or *Dux* siRNAs. Data are mean  $\pm$  s.e.m of two independent cell lines,  
921 representative of 2 experiments.
- 922 (F) Schematic for embryo iPol I inhibitor experiments with 1  $\mu\text{M}$  BMH-21 or CX-5461.
- 923 (G) CNN qRT-PCR expression data following 8h iPol I in mid 2-cell embryos showing inhibited *Dux*  
924 repression. Data are mean  $\pm$  s.e.m, n=4 experiments with equal numbers of embryos, with levels  
925 at 0 h set to 1 in each experiment. P values, 1-way ANOVA with Dunnett multiple comparisons  
926 correction.
- 927 (H) CNN qRT-PCR expression data showing *Dux* upregulation after 24h 1  $\mu\text{M}$  CX-5461. Data are mean  
928  $\pm$  s.e.m n=4 experiments. P values, Welch's two-tailed t-test.



929 (I) Embryo progression rates following 24h iPol I treatment in n=4 experiments (CX-5461) and n=2  
930 experiments (BMH-21). P values, Chi-squared test, n=number of embryos.

931

932 **Figure 5. Nucleolar disruption induces *Dux* relocalisation and activation**

933 (A-B) Example images of chromatin distribution as marked by DAPI staining in 3D-SIM imaging  
934 experiments in (A) 2C-pos versus 2C-neg cells and (B) in ESCs upon 8h iPol I. 2C-neg cells  
935 and (B) control but not iPol I ESCs have nucleolar chromatin fibres, visible as a  
936 roughened nucleolar border (orange arrows, inset). Scale bar, 5  $\mu$ m.

937 (C) Representative immuno-DNA FISH images at the indicated timepoints of iPol I for *Dux* alleles (red)  
938 compared to nucleolar (B23, magenta) or nuclear lamina (LaminB, green) compartments. Scale  
939 bar, 10  $\mu$ m.

940 (D) Quantification of *Dux* localisation at 4h iPol I showing movement away from the nucleolus, P values,  
941 Chi-squared test. N, number of loci

942 (E) Dotplot of GSEA enrichment scores (NES) and significance (FDR) for Type I or Type II NADs using  
943 expression data following iPol I, or following LINE1/Ncl KD (Percharde et al. 2018).

944 (F) Boxplot of log<sub>2</sub>-fold change values for Type I NADs (n=1565) or Type II NADs (n=371) versus all  
945 genes at 8h iPol I. P values, two-sided Wilcoxon rank-sum test, comparing Type I/II NADs to all  
946 genes.

947 (G) Immunofluorescence for nucleolar markers B23 and Fbl after the indicated times of incubation with  
948 1% 1,6-hexanediol (HDL), with or without washout and recovery in normal media, and (below)  
949 quantification of the percentage of RingShape+ nucleoli (n), scale bar, 20  $\mu$ m. P values, Chi-  
950 squared test with Bonferroni adjustment for multiple comparisons.

951 (H) Scoring of *Dux* loci nuclear positioning following HDL treatments from *Dux* immuno-FISH  
952 experiments; n, number of loci from two FISH experiments. P values, Chi-squared test, with  
953 Bonferroni adjustment for multiple comparisons.

954 (I) Expression of *Dux* by qRT-PCR following HDL treatment, data are mean +/- s.e.m for n=3 biological  
955 replicates, representative of two independent experiments. P values, one-way ANOVA with Dunnett  
956 correction for multiple comparisons.

957

958 **Figure 6. A model for nucleolar-based *Dux* and 2C-state repression**

959 Nucleolar maturation allows for *Dux* repression and 2-cell exit. In early embryos and 2C-like cells, NPBs  
960 have altered morphology, reduced function and reduced chromatin association. We propose this  
961 provides a permissive environment for *Dux* and subsequent 2C/MERV1 expression. In mature nucleoli  
962 with high rRNA output, *Dux* is recruited to perinucleolar chromatin and is repressed. Disruption of  
963 nucleolar integrity via iPol I or inhibition of nucleolar phase separation releases *Dux* and leads to its de-  
964 repression.

Figure 1

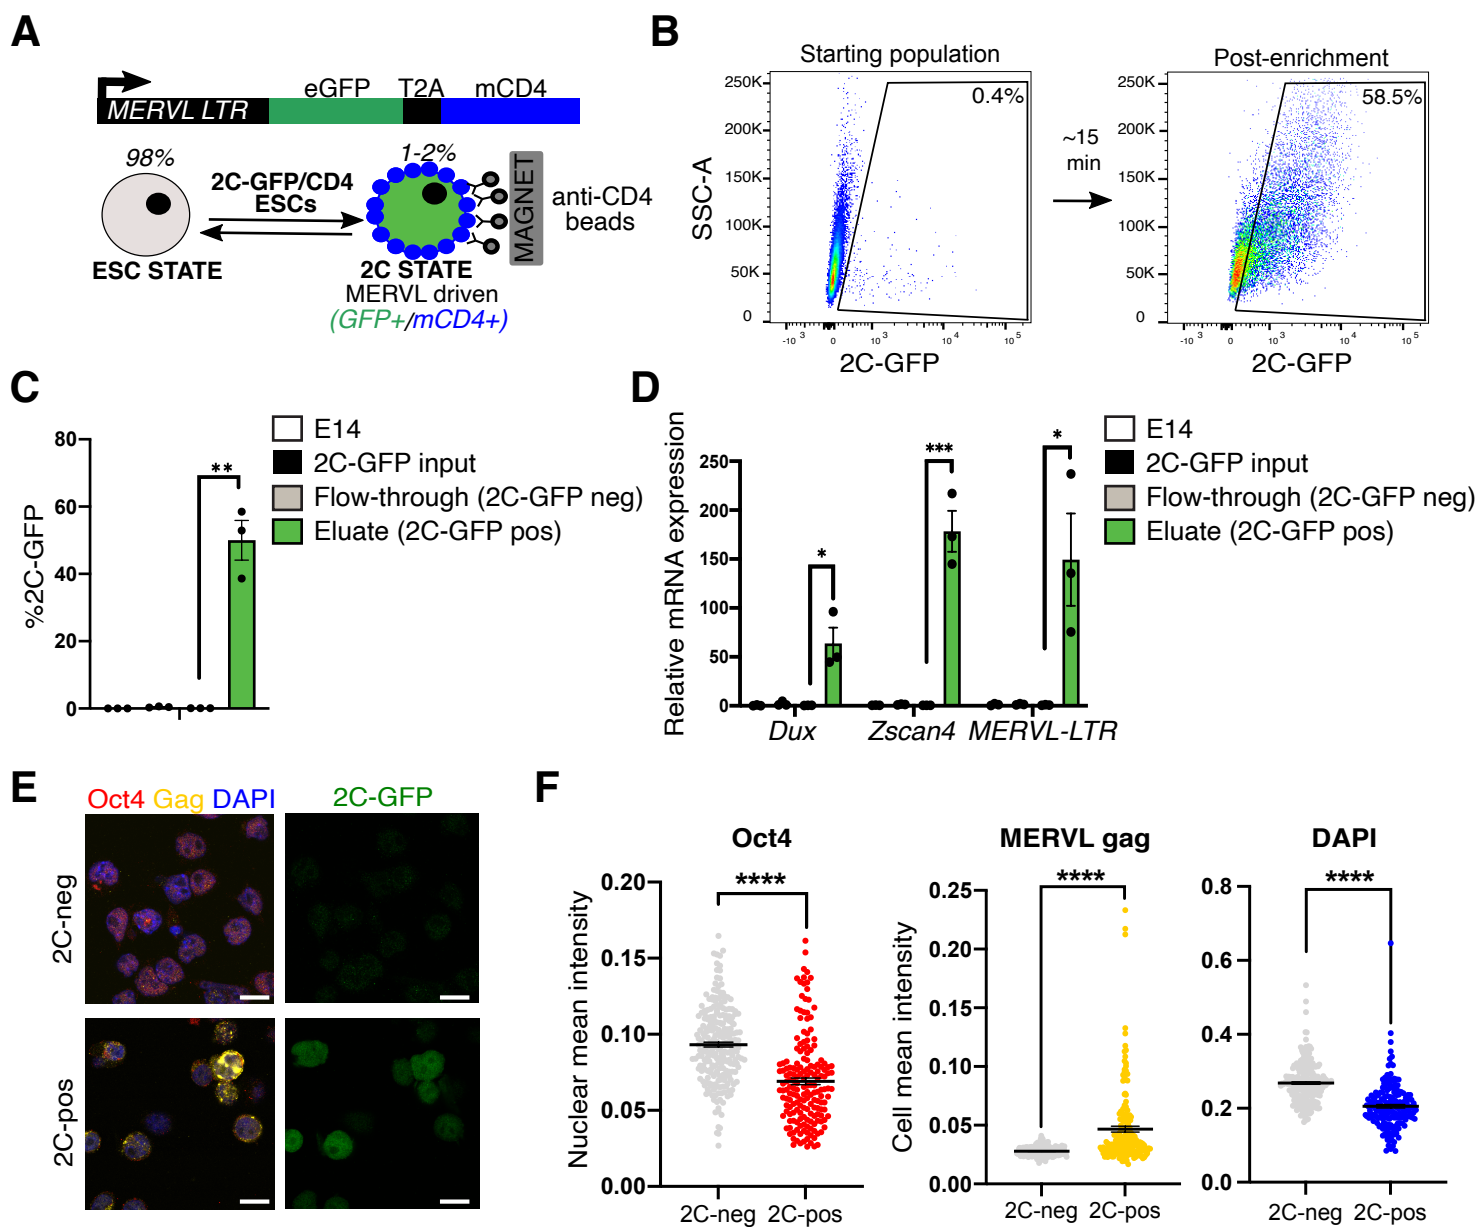

**Figure 1. A new reporter cell line for purification of 2C-like cells.**

- (A) Reporter design: a previous MERVL-GFP reporter<sup>31</sup> is modified to contain the extracellular portion of the CD4 antigen downstream of GFP and a T2A cleavage element, allowing rapid 2C-like cell purification by anti-CD4 beads.
- (B) Representative flow cytometry plot depicting proportion of typical 2C-GFP+ (2C-pos) cells before (left) and after (right) CD4-based 2C enrichment.
- (C) Percent recovery of 2C-GFP positive (pos) cells after CD4-based purification, comparing CD4+ cells (eluate) and CD4- cells (flow-through). Data are mean +/- s.e.m of 3 experiments.
- (D) qRT-PCR validation of high levels of 2C-specific genes and TEs in the CD4+ eluate compared to CD4- fraction and the starting population. Data are mean +/- s.e.m of 3 experiments.
- (E) Representative confocal images and (F) quantification of levels of Oct4 and MERVL gag proteins and DAPI in 2C-pos versus 2C-neg cells following CD4-based purification. Scale bar, 20  $\mu$ m

All P values represent two-tailed, unpaired Student's t-test, with Welch correction for uneven variance where relevant.

**Figure 2**

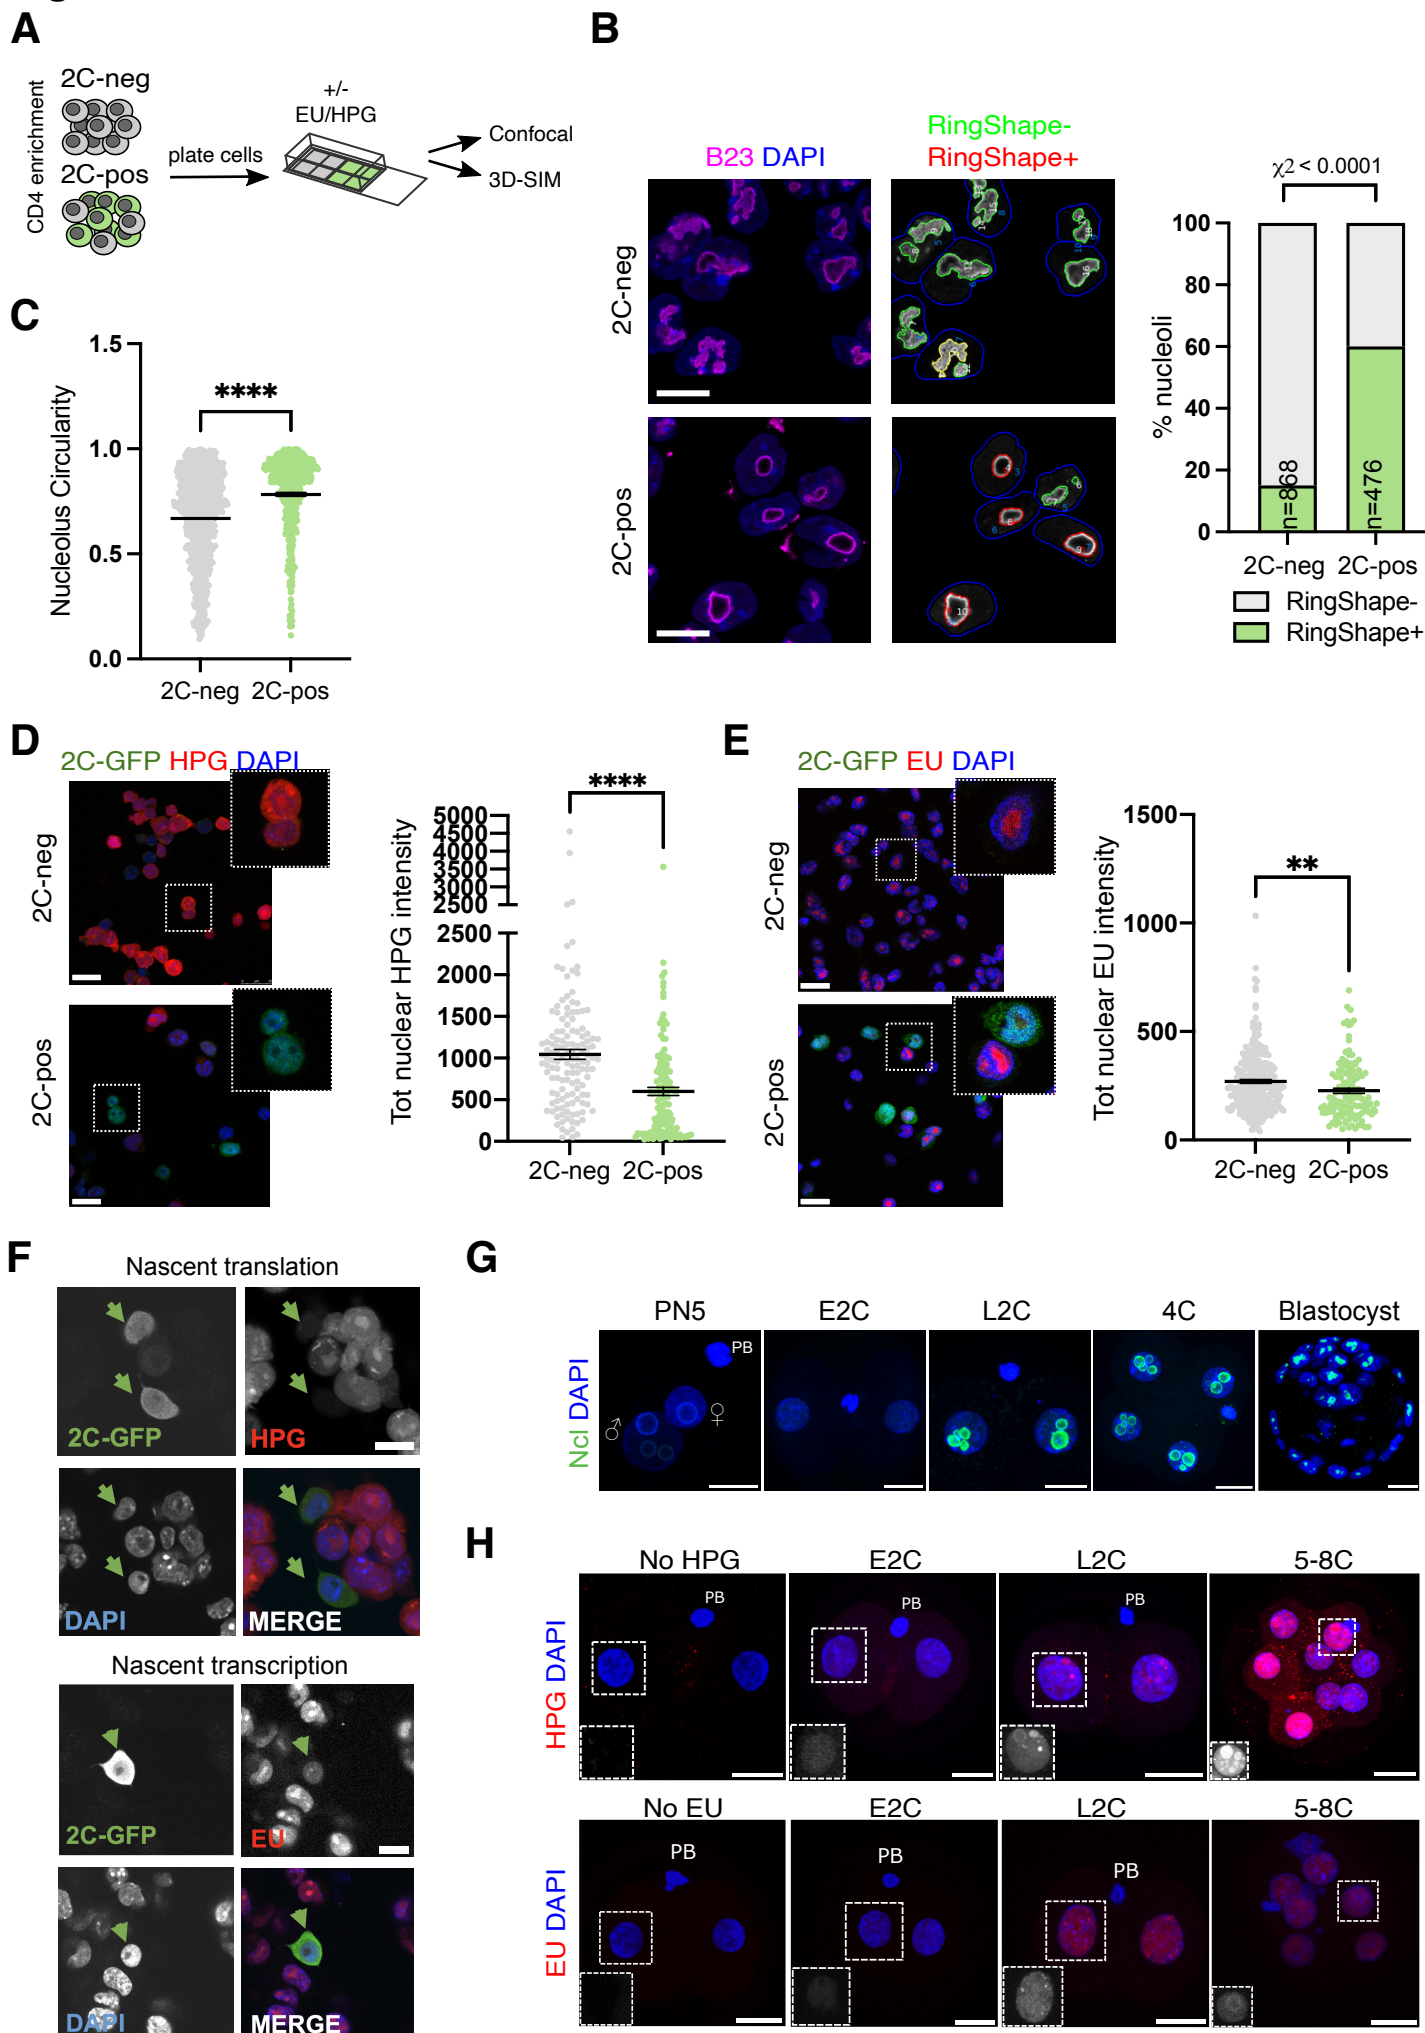

**Figure 2. 2C-like cells and embryos have altered nucleolar morphology and function.**

- (A) Experimental set-up for 2C-like cell profiling: following CD4-based enrichment, 2C-neg/pos populations are plated into Matrigel-coated chambers for a minimum of 1h before the indicated downstream applications.
- (B) Immunofluorescence images and quantification (RingShape+, CellProfiler) appearance in 2C-pos/neg cells, revealing that 2C-like cell nucleoli, stained by the nucleolar marker B23 (Npm1), have rounded, ring-like morphology, n, number of nucleoli scored. Scale bar, 20  $\mu$ m.
- (C) Nucleolar circularity is significantly increased in 2C-like cells. Very small nucleoli (area <100 pixels) were filtered out as can typically generate unreliable measurements (see methods).
- (D-E) Immunofluorescence images and quantification of (D) nascent translation and (E) nascent transcription rates in 2C-pos versus 2C-neg cells via HPG or EU Click-iT incorporation experiments, respectively. Scale bar, 25  $\mu$ m.
- (F) Confirmation of reduced transcription and translation in 2C-like (2C-GFP+) cells within unsorted populations, using an independent 2C-GFP cell line<sup>30</sup>. Scale bar, 10  $\mu$ m.
- (G) Nucleolar (Nucleolin, Ncl) staining in in vitro cultured embryos, showing the emergence of Ncl+ nucleoli at the late 2-cell stage (L2C). PN5, zygote PN5 stage, E2C, early 2-cell stage; PB, polar body. Scale bar, 20  $\mu$ m
- (H) Analysis of nascent transcription/translation in embryos by EU/HPG assays. Scale bar, 20  $\mu$ m. Insets show EU/HPG staining alone (grayscale) in a representative blastomere from each image. P values represent (B) Chi-squared test and (C, D-E) two-tailed Student's t-test, with Welch's correction for uneven variance where relevant.

Figure 3

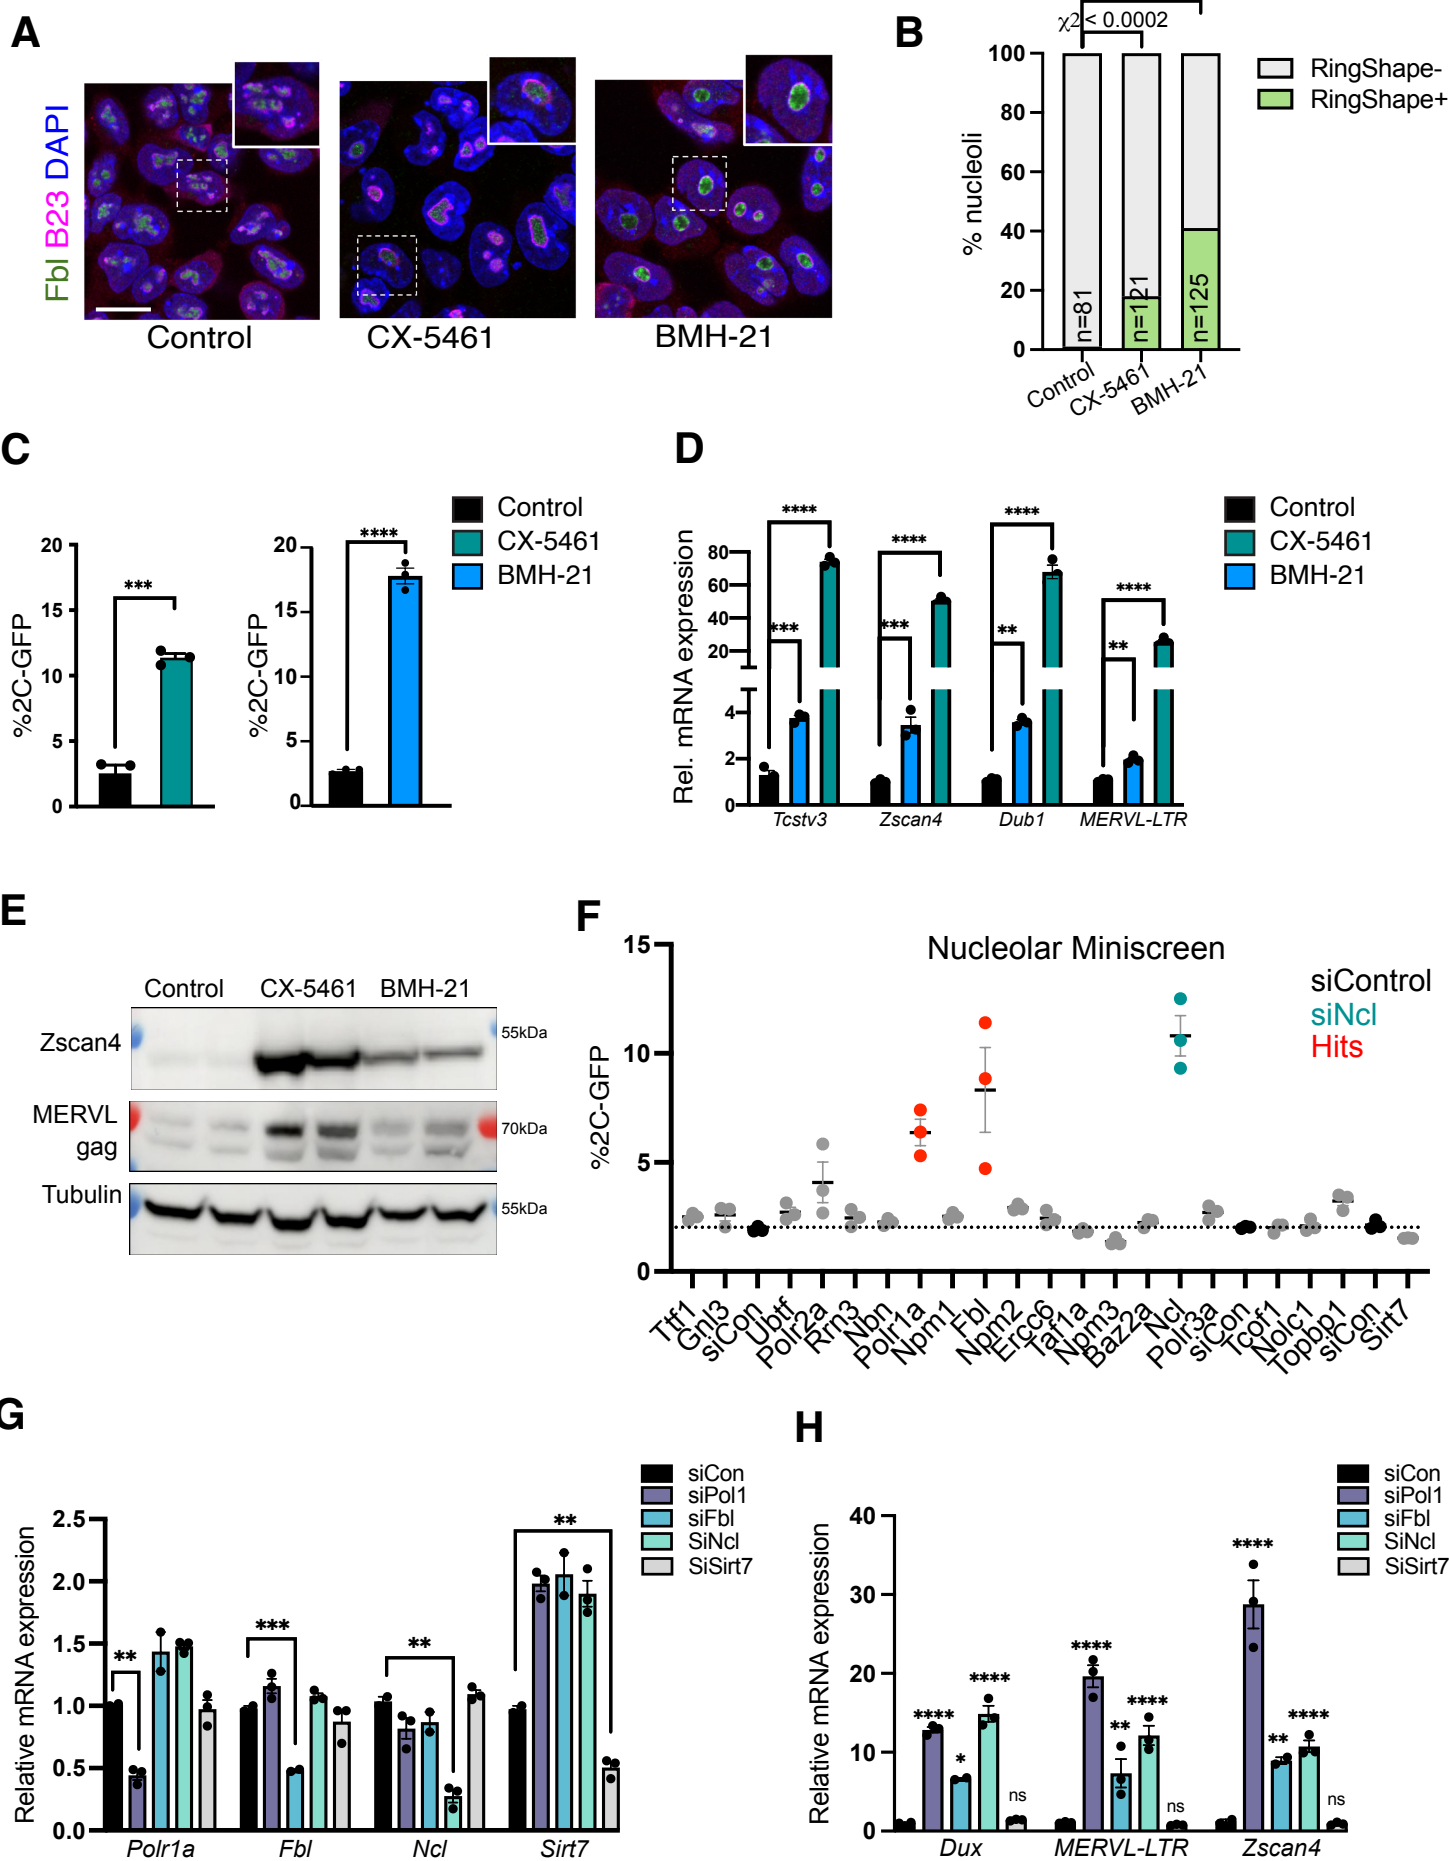

**Figure 3. Nucleolar disruption induces the 2C-like state.**

- (A) Representative immunofluorescence images following staining for nucleolar markers (Fibrillarin, Fbl) and B23 4h after RNA Pol I inhibition (iPol I), with either CX-5461 or BMH-21. Scale bar, 20  $\mu$ m.
- (B) Quantification of the percentage of ring-like (RingShape+) nucleoli 4h after iPol I. P values, Chi-squared test; n, number of nucleoli.
- (C) Percentage of 2C-GFP+ cells following overnight (16-24h) treatment with 0.25  $\mu$ M iPol I, data are mean  $\pm$  s.e.m, n=3 biological replicates representative of 3+ experiments.
- (D) qRT-PCR analysis of 2C-specific genes and TEs following iPol I as in (C), with P values in (C-D) representing 2-tailed t-test with two-stage multiple comparisons correction.
- (E) Western blots showing upregulation of 2C-specific proteins, Zscan4 and MERVL gag, after 16-24h iPol I in ESCs. Replicates from two experiments are shown.
- (F) Flow cytometry analysis of % 2C-GFP+ cells following siRNA knockdown of the indicated factors. Red samples indicate a Z-score of  $>1$ , with KD of Ncl shown as a positive control (teal). Data are mean  $\pm$  s.e.m of 3 biological replicates, representative of two repeats of the screen.
- (G) Validation by qRT-PCR of siRNA-mediated knockdown of the indicated factors and
- (H) upregulation of 2C-specific genes, showing mean  $\pm$  s.e.m of n=2-3 biological replicates, representative of 2 experiments. P values, 2-way ANOVA followed by Dunnett's multiple comparisons test.

Figure 4

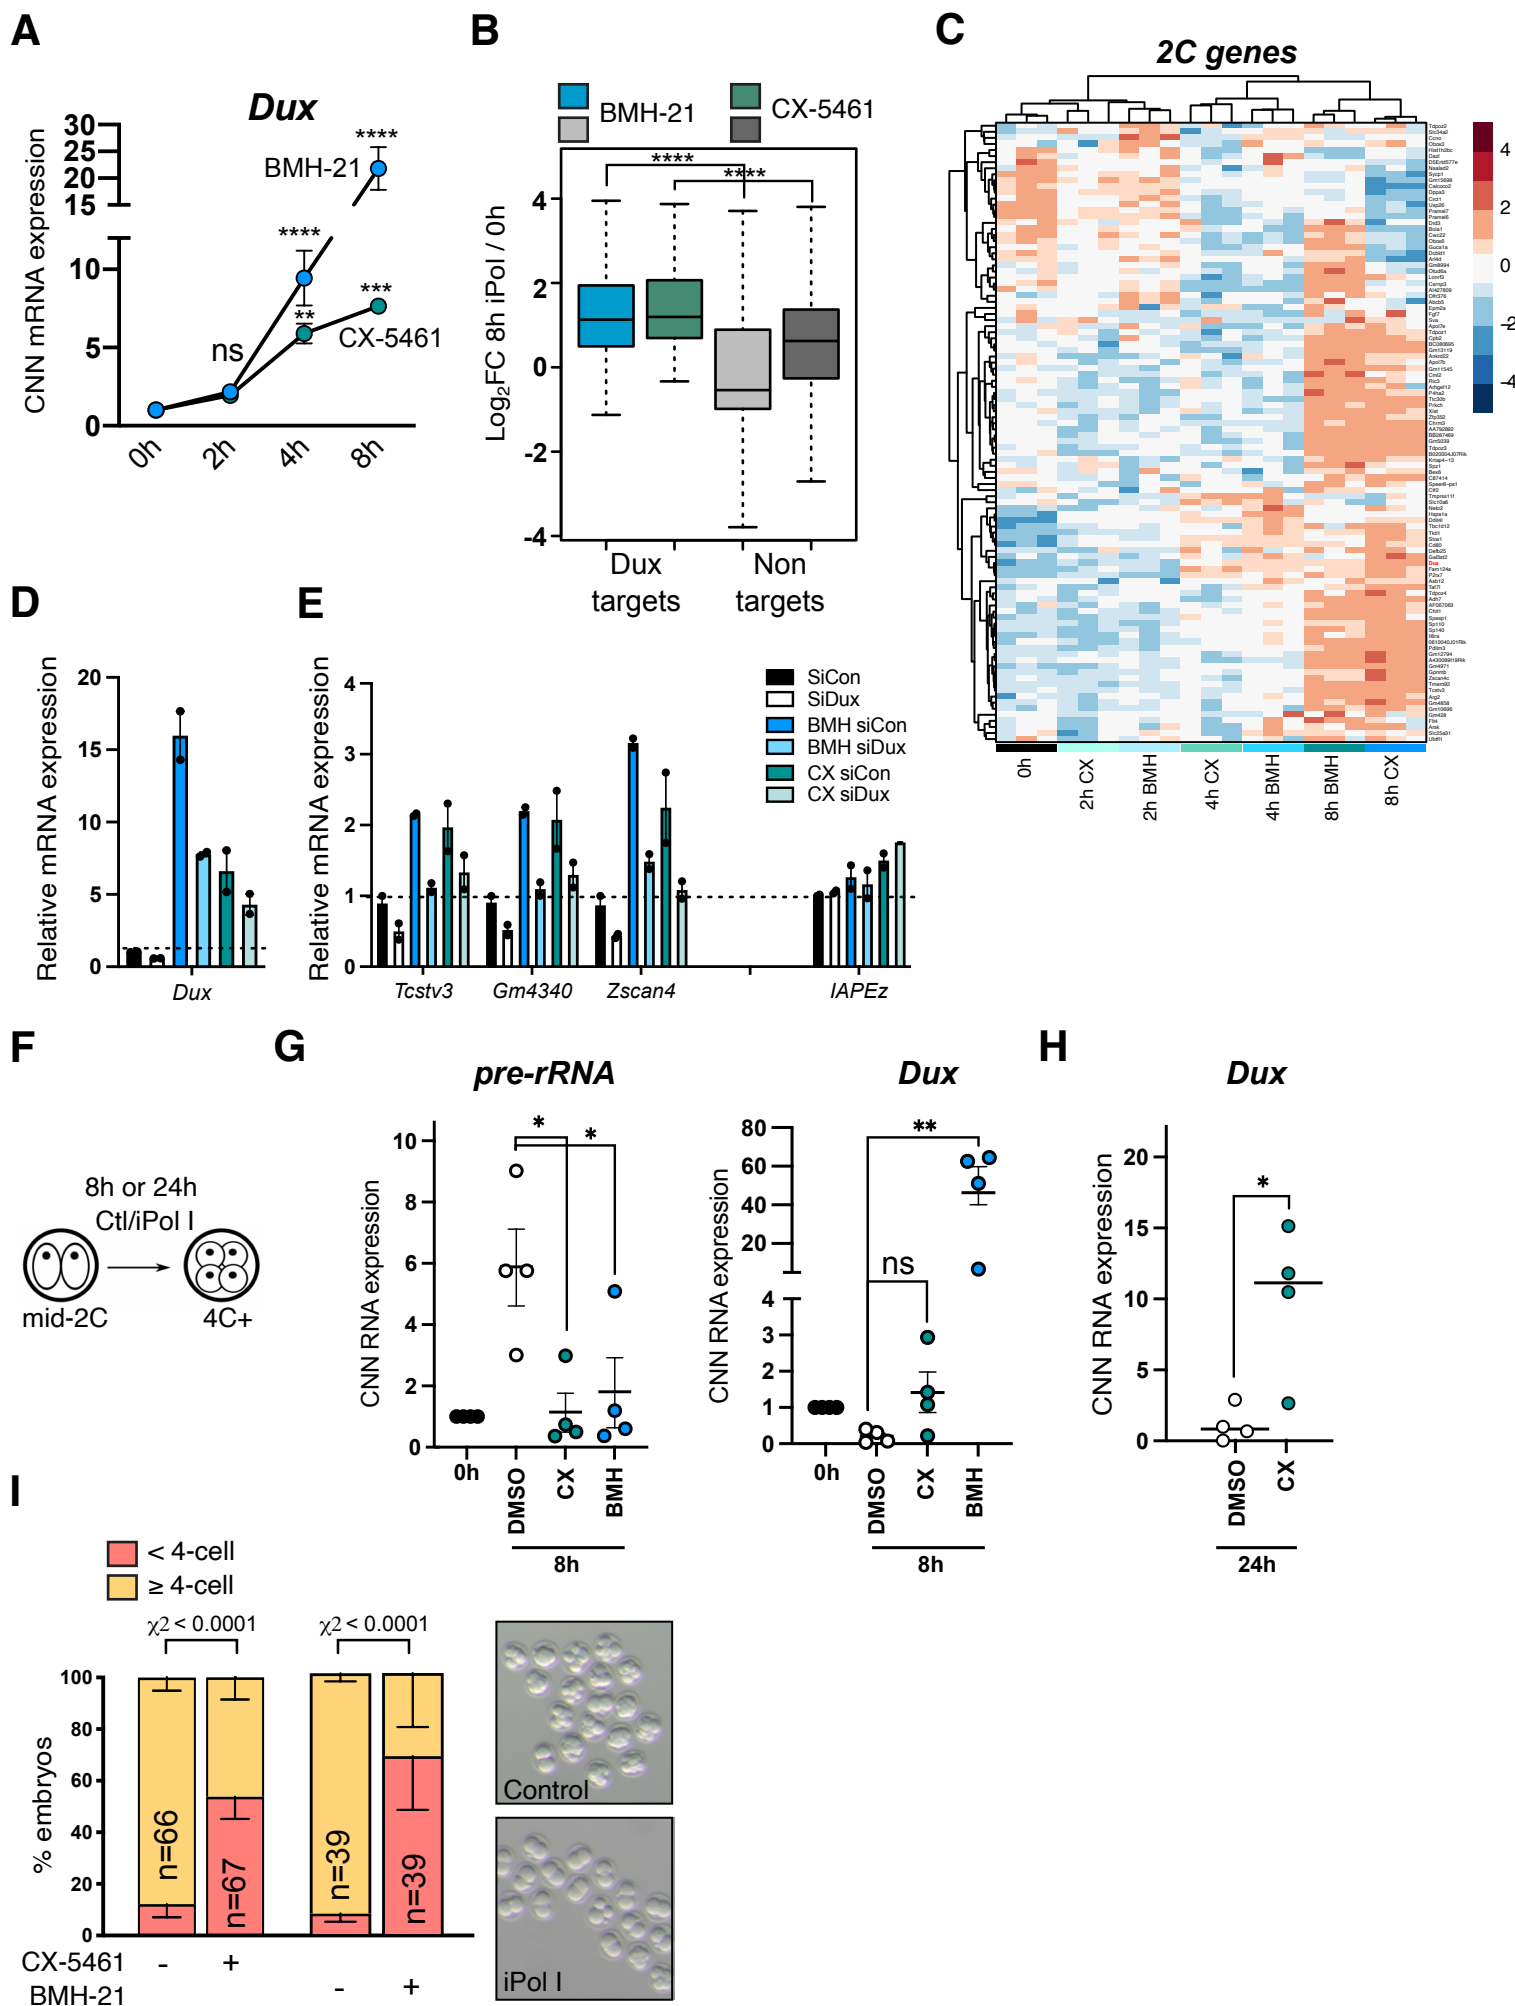



**Figure 4. Nucleolar disruption causes *Dux* reactivation in ESCs and embryos.**

- (A) Cell-number normalised (CNN) qRT-PCR time course analysis of *Dux* upregulation following iPol I. Data are analysed as CNN to exclude potential global effects of iPol I on transcription; however the same results are seen with *Rpl7/H2A* normalisation. Data are mean +/- s.e.m, n=3 biological replicates. P values, two-way ANOVA and Šídák multiple comparisons test.
- (B) Boxplot of log<sub>2</sub>-fold change values for n=99 *Dux* target genes<sup>30</sup> versus significantly altered non-targets (FDR <0.05, n=8057: CX-5461, n=13830: BMH-21) following 8h iPol I. P values, two-sided Wilcoxon rank-sum test.
- (C) Heatmap of 2C-specific genes<sup>5</sup> showing gradual upregulation following iPol I. Samples are grouped by unsupervised hierarchical clustering.
- (D-E) Expression of (D) *Dux* and (E) 2C-specific genes or a negative control (IAPEz) in iPol I rescue experiments with control or *Dux* siRNAs. Data are mean +/- s.e.m of two independent cell lines, representative of 2 experiments.
- (F) Schematic for embryo iPol I inhibitor experiments with 1 μM BMH-21 or CX-5461.
- (G) CNN qRT-PCR expression data following 8h iPol I in mid 2-cell embryos showing inhibited *Dux* repression. Data are mean +/- s.e.m, n=4 experiments with equal numbers of embryos, with levels at 0 h set to 1 in each experiment. P values, 1-way ANOVA with Dunnett multiple comparisons correction.
- (H) CNN qRT-PCR expression data showing *Dux* upregulation after 24h 1 μM CX-5461. Data are mean +/- s.e.m n=4 experiments. P values, Welch's two-tailed t-test.
- (I) Embryo progression rates following 24h iPol I treatment in n=4 experiments (CX-5461) and n=2 experiments (BMH-21). P values, Chi-squared test, n=number of embryos.

**Figure 5**

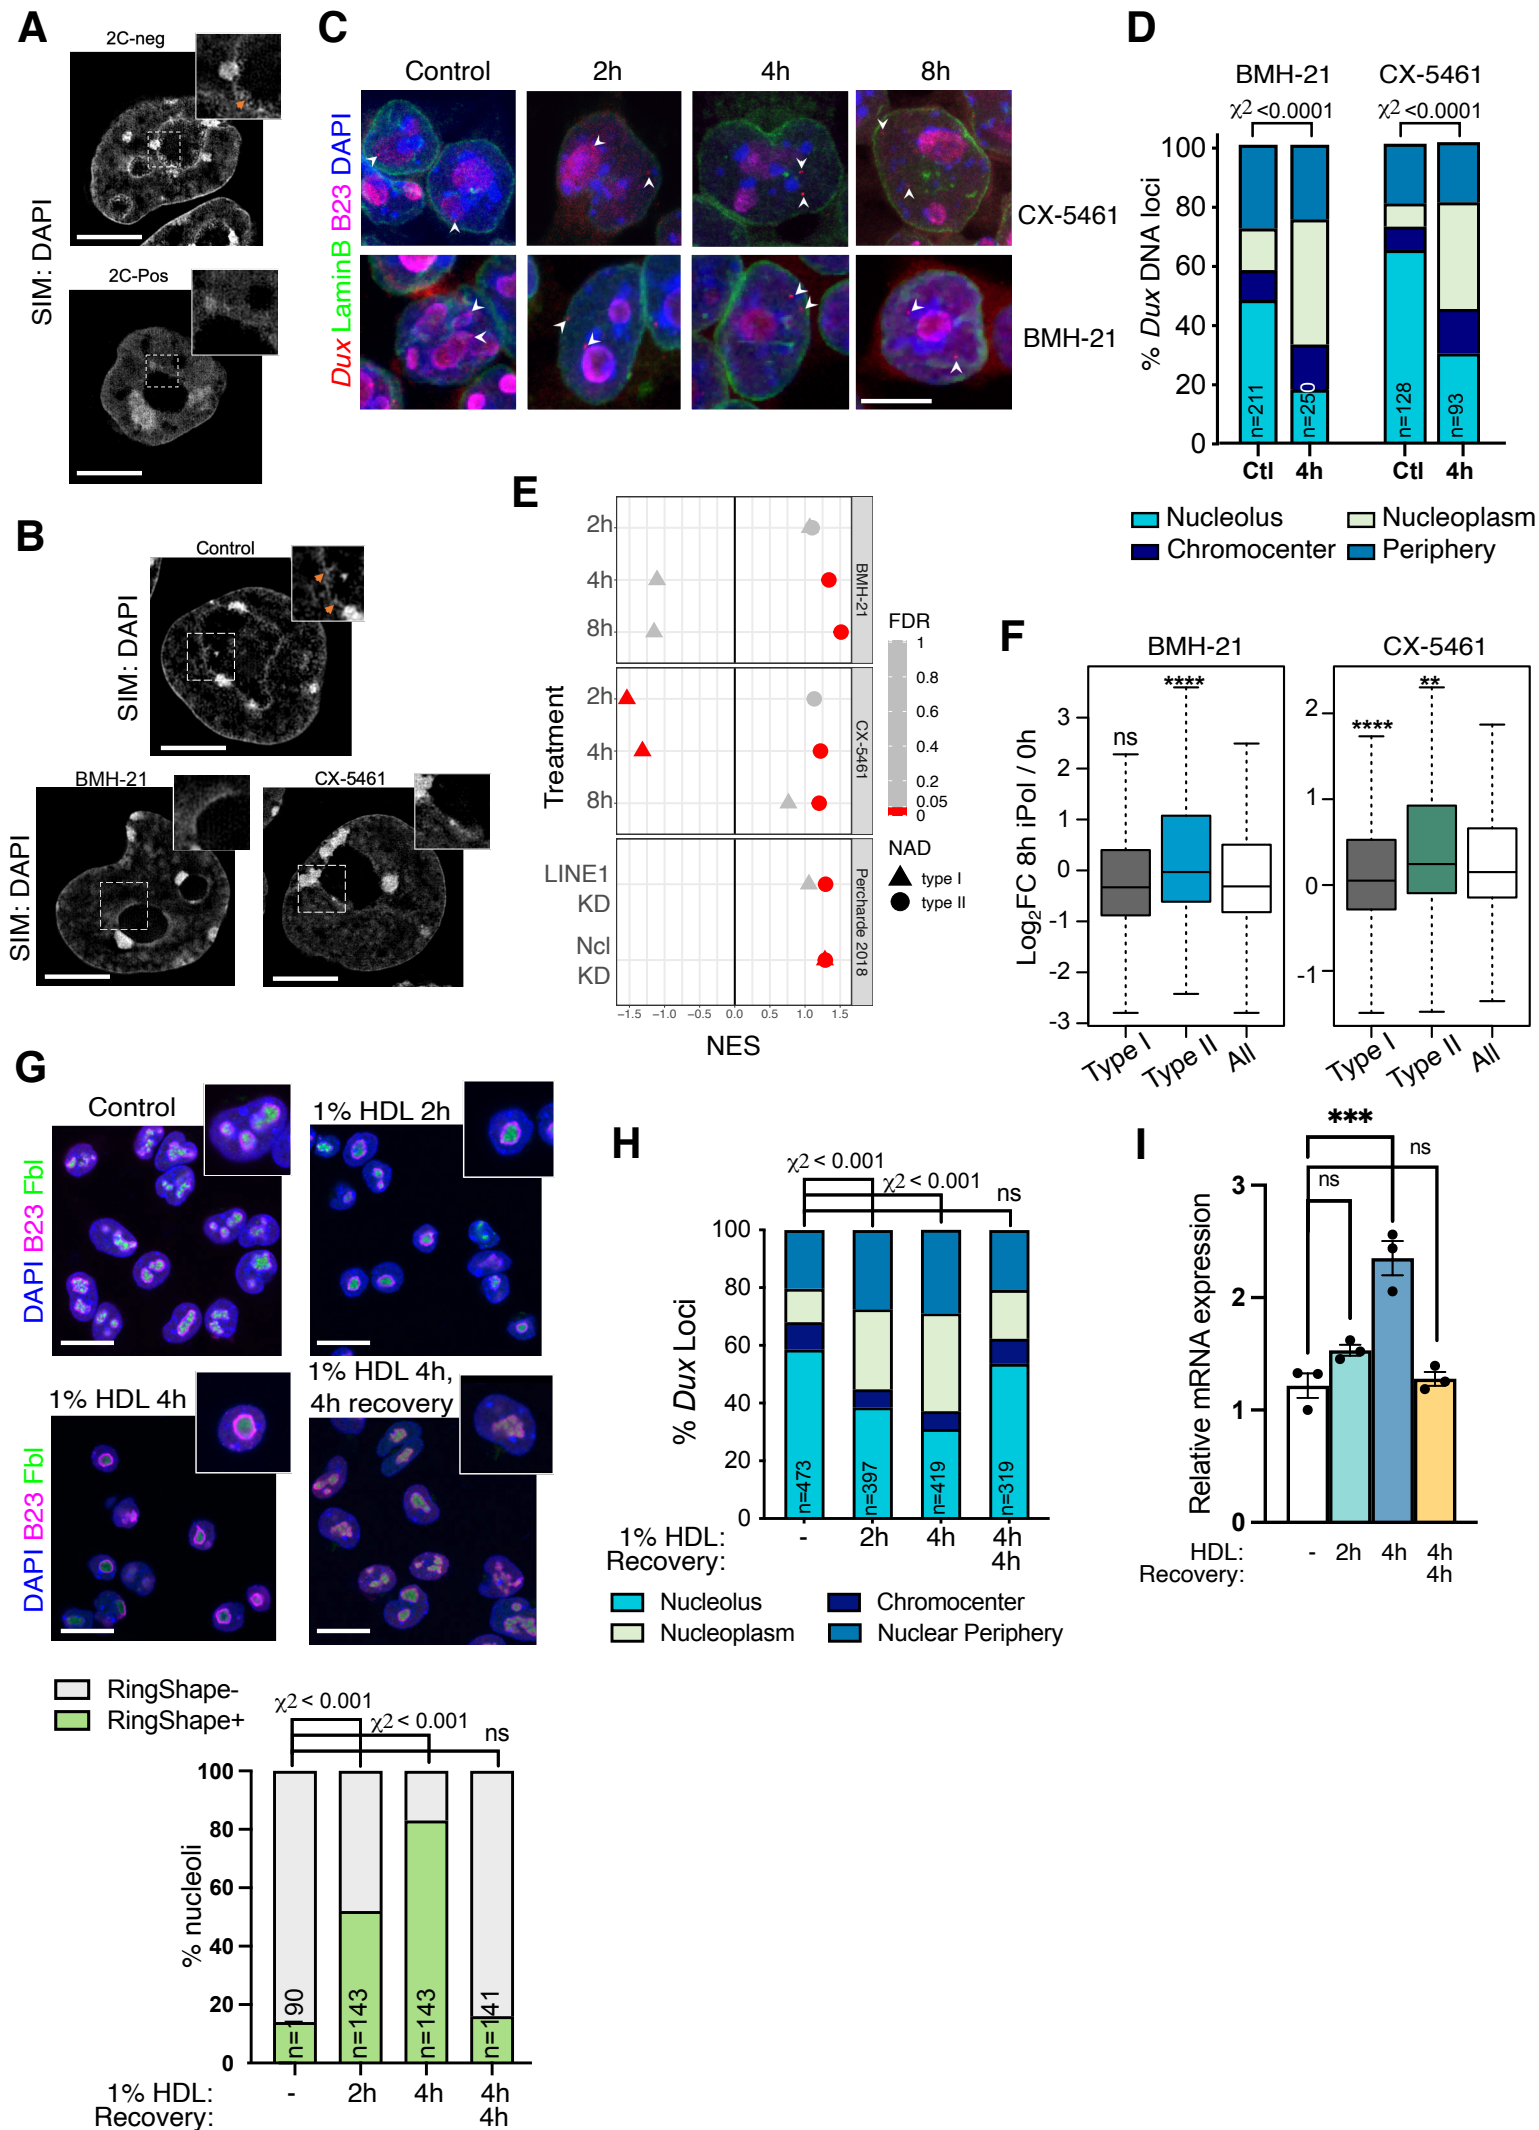

### Figure 5. Nucleolar disruption induces *Dux* relocalisation and activation

- (A-B) Example images of chromatin distribution as marked by DAPI staining in 3D-SIM imaging experiments in (A) 2C-pos versus 2C-neg cells and (B) in ESCs upon 8h iPol I. 2C-neg cells and (B) control but not iPol I ESCs have nucleolar chromatin fibres, visible as a roughened nucleolar border (orange arrows, inset). Scale bar, 5  $\mu\text{m}$ .
- (C) Representative immuno-DNA FISH images at the indicated timepoints of iPol I for *Dux* alleles (red) compared to nucleolar (B23, magenta) or nuclear lamina (LaminB, green) compartments. Scale bar, 10  $\mu\text{m}$ .
- (D) Quantification of *Dux* localisation at 4h iPol I showing movement away from the nucleolus, P values, Chi-squared test. N, number of loci
- (E) Dotplot of GSEA enrichment scores (NES) and significance (FDR) for Type I or Type II NADs using expression data following iPol I, or following LINE1/Ncl KD <sup>30</sup>.
- (F) Boxplot of log<sub>2</sub>-fold change values for Type I NADs (n=1565) or Type II NADs (n=371) versus all genes at 8h iPol I. P values, two-sided Wilcoxon rank-sum test, comparing Type I/II NADs to all genes.
- (G) Immunofluorescence for nucleolar markers B23 and Fbi after the indicated times of incubation with 1% 1,6-hexanediol (HDL), with or without washout and recovery in normal media, and (below) quantification of the percentage of RingShape+ nucleoli (n), scale bar, 20  $\mu\text{m}$ . P values, Chi-squared test with Bonferroni adjustment for multiple comparisons.
- (H) Scoring of *Dux* loci nuclear positioning following HDL treatments from *Dux* immuno-FISH experiments; n, number of loci from two FISH experiments. P values, Chi-squared test, with Bonferroni adjustment for multiple comparisons.
- (I) Expression of *Dux* by qRT-PCR following HDL treatment, data are mean  $\pm$  s.e.m for n=3 biological replicates, representative of two independent experiments. P values, one-way ANOVA with Dunnett correction for multiple comparisons.

Figure 6

Xie et al

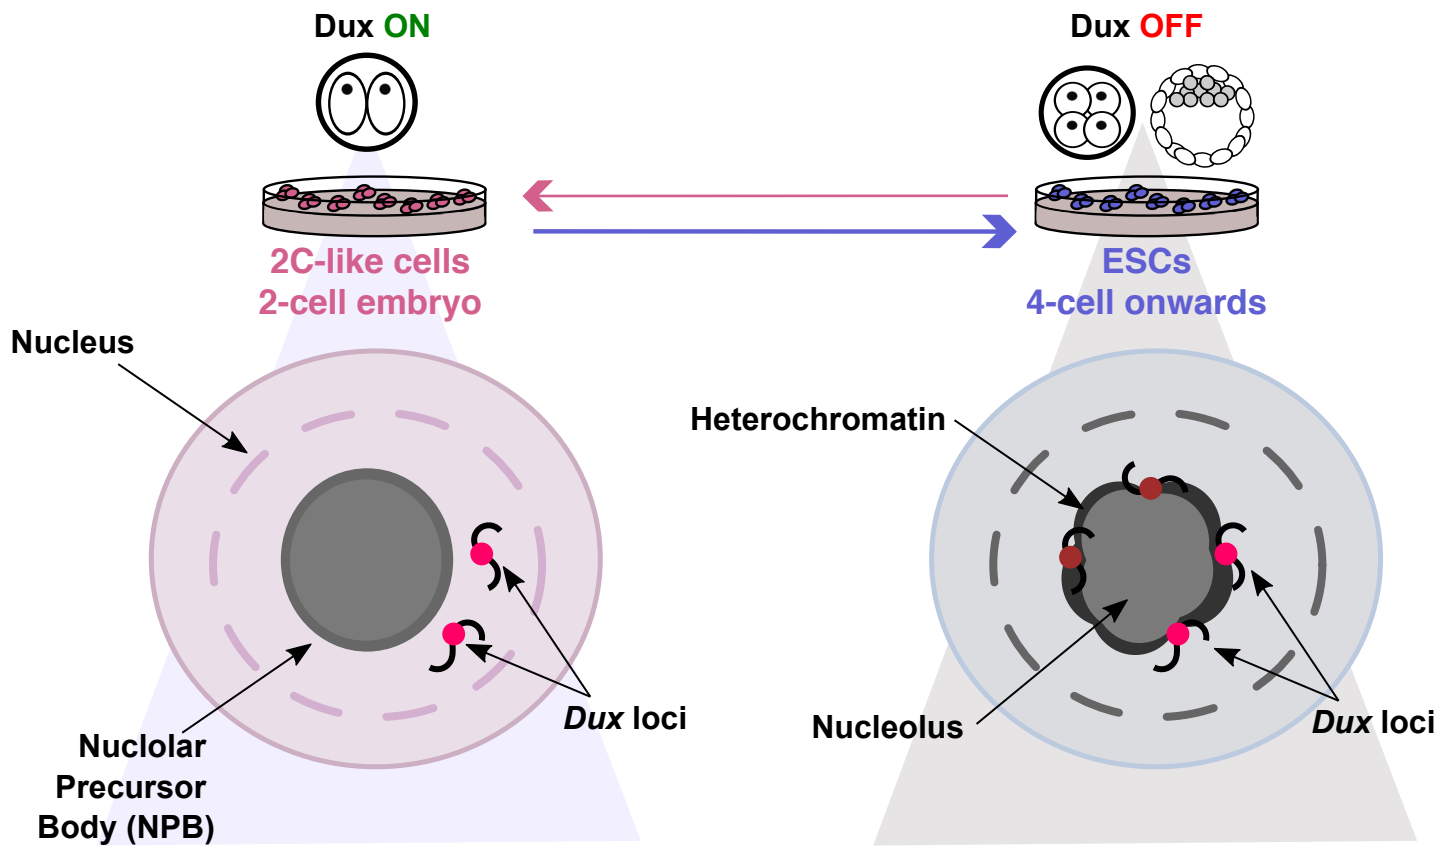

**2C state / nucleolar disruption:**

Immature NPBs  
Reduced nucleolar function  
Dux ON --> MERVL ON  
2-cell state ON

**2C exit / WT ESCs:**

Mature nucleoli  
High rRNA and transcription/translation  
Dux in perinucleolar chromatin  
Dux OFF --> MERVL OFF

**Figure 6. A model for nucleolar-based *Dux* and 2C repression**

Nucleolar maturation allows for *Dux* repression and 2-cell exit. In early embryos and 2C-like cells, NPBs have altered morphology, reduced function and reduced chromatin association. We propose this provides a permissive environment for *Dux* and subsequent 2C/MERV1 expression. In mature nucleoli with high rRNA output, *Dux* is recruited to perinucleolar chromatin and is repressed. Disruption of nucleolar integrity via iPol I or inhibition of nucleolar phase separation releases *Dux* and leads to its de-repression.
